# Supplementary material for: Synthesis and characterization of novel chiral derivatizing agents containing β-keto-anthracene adducts (KAAs) by 1H-NMR: aromatic influence and chiral alcohol absolute configuration determination
Source: Royal Society of Chemistry journal article supplement (doi:10.1039/c8ob02662a), 2018-12-21
Supplement: c8ob02662a1.pdf [file c8ob02662a1.pdf]

## Supporting Information

for

### Synthesis and Characterization of Novel Chiral Derivatizing Agents Containing $\beta$ -Keto-Anthracene Adducts (KAAs) by $^1\text{H}$ -NMR: Aromatic influence and chiral alcohol absolute configuration determination

Neeranuth Intakaew,<sup>a,b,c</sup> Puracheth Rithchumpon,<sup>a,c</sup> Chanatkran Prommin,<sup>a,c</sup> Saranphong Yimklan,<sup>a</sup>  
Nawee Kungwan,<sup>a</sup> Praput Thavornnyutikarn<sup>a</sup> and Puttinan Meepowpan<sup>\*a,b,d</sup>

<sup>a</sup>Department of Chemistry, Faculty of Science, Chiang Mai University, 239 Huay Kaew Road, Chiang Mai 50200, Thailand

<sup>b</sup>Center of Excellence for Innovation in Chemistry (PERCH-CIC), Faculty of Science, Chiang Mai University, 239 Huay Kaew Road, Chiang Mai 50200, Thailand

<sup>c</sup>Graduate School, Chiang Mai University, 239 Huay Kaew Road, Chiang Mai 50200, Thailand

<sup>d</sup>Material Science Research Center (MsRC), Faculty of Science, Chiang Mai University, 239 Huay Kaew Road, Chiang Mai 50200, Thailand

Tel: +66 53 943341-5 ext. 226; E-mail: [pmeepowpan@gmail.com](mailto:pmeepowpan@gmail.com)

#### Table of contents

|     |                 |                                                                                                                                                |    |
|-----|-----------------|------------------------------------------------------------------------------------------------------------------------------------------------|----|
| 1.  | <b>Table 1S</b> | Crystallographic information for (–)-(1'S,1"R,11R)- <b>16a</b> and (–)-(1'S,1"R,11R)- <b>18a</b>                                               | 4  |
| 2.  | <b>Table 2S</b> | Weak hydrogen bond in crystal structure of (–)-(1'S,1"R,11R)- <b>16a</b>                                                                       | 5  |
| 3.  | <b>Fig. 1S</b>  | Asymmetric unit of (–)-(1'S,1"R,11R)- <b>16a</b>                                                                                               | 2  |
| 4.  | <b>Fig. 2S</b>  | Crystal structures of (–)-(1'S,1"R,11R)- <b>18a</b>                                                                                            | 3  |
| 5.  | <b>Fig. 3S</b>  | Intermolecular C-H...O hydrogen bond between the two conformers ( <b>A</b> and <b>B</b> ) in asymmetric unit of (–)-(1'S,1"R,11R)- <b>16a</b>  | 5  |
| 6.  | <b>Fig. 4S</b>  | Graphical representative of conformer <b>A</b> and conformer <b>B</b> of (–)-(1'S,1"R,11R)- <b>16a</b>                                         | 6  |
| 7.  | <b>Fig. 5S</b>  | Graphical representative of (–)-(1'S,1"R,11R)- <b>18a</b> showing C-H... $\pi$ bond                                                            | 6  |
| 8.  | <b>Fig. 6S</b>  | Comparison of the selected $\Delta\delta^{RS}$ values of ( <i>R</i> )- and ( <i>S</i> )-phenylethanol KAA esters obtained in both NMR solvents | 7  |
| 9.  | <b>Fig. 7S</b>  | Comparison of the $^1\text{H}$ -NMR of ( <i>R</i> )- and ( <i>S</i> )-phenylethanol KAA esters in Acetone- $d_6$                               | 8  |
| 10. | <b>Fig. 8S</b>  | Comparison of the $^1\text{H}$ -NMR spectra of ( <i>R</i> )-phenylethanol KAA esters in different time periods                                 | 9  |
| 11. | <b>Fig. 9S</b>  | Comparison of the $^1\text{H}$ -NMR spectra of ( <i>S</i> )-phenylethanol KAA esters in different time periods                                 | 9  |
| 12. | <b>Fig. 10S</b> | Comparison of the $^1\text{H}$ -NMR spectra of (–)-menthol KAA esters in different time periods                                                | 10 |
| 13. | <b>Fig. 11S</b> | Comparison of the $^1\text{H}$ -NMR spectra of (–)-borneol KAA esters in different time periods                                                | 10 |
| 14. |                 | $^1\text{H}$ -NMR and $^{13}\text{C}$ -NMR spectra of compounds <b>9–24</b>                                                                    | 12 |

**Crystal structures of (–)-(1'S,1''R,11R)-16a and (–)-(1'S,1''S,11R)-18a****Absolute Configurations Determination by X-ray Crystallography**

Single crystals of (–)-(1'S,1''R,11R)-**16a** and (–)-(1'S,1''S,11R)-**18a** were perfectly recrystallized in 20% CH<sub>2</sub>Cl<sub>2</sub> in hexane. Suitable crystals were selected and subjected to X-ray diffraction on a Bruker APEX-II CCD diffractometer with Mo K $\alpha$  radiation ( $\lambda$  = 0.71073). The crystals were kept at ambient condition during data collection. Using Olex,<sup>4</sup> the structure was solved with the SHELXT structure solution program using Intrinsic Phasing and refined with the SHELXL refinement package using Least Squares minimization.<sup>1,2</sup> Asymmetric unit of (–)-(1'S,1''R,11R)-**16a** and (–)-(1'S,1''S,11R)-**18a** are illustrated in Fig 1S and 2S, respectively.

The enantiomerically pure compounds **13** as starting materials and their absolute stereochemistry at the C11 stereogenic center was determined by X-ray crystallographic analysis which have already been reported by Kongsaree *et. al* in 2001.<sup>3</sup> Therefore, the absolute configurations of the rest of the molecules are then relatively determined using the configuration at C11 as an internal reference.<sup>4</sup> Crystallographic information for the two crystals are shown in Table 1S. Hydrogen bonds in (–)-(1'S,1''R,11R)-**16a** are listed in Table 2S.

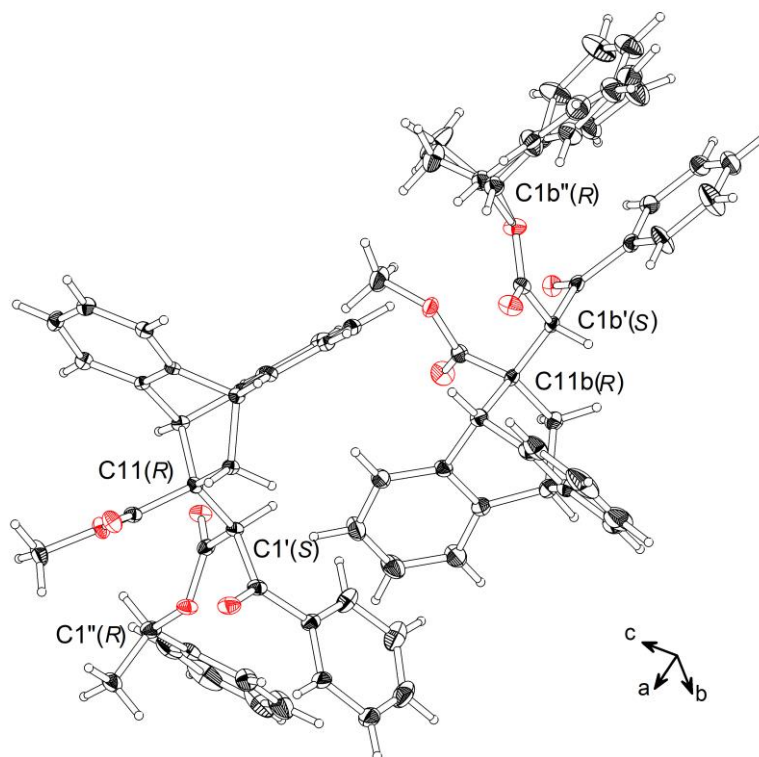

**Fig. 1S** Asymmetric unit of (–)-(1'S,1''R,11R)-**16a**; thermal ellipsoids are drawn at the 10% probability level.

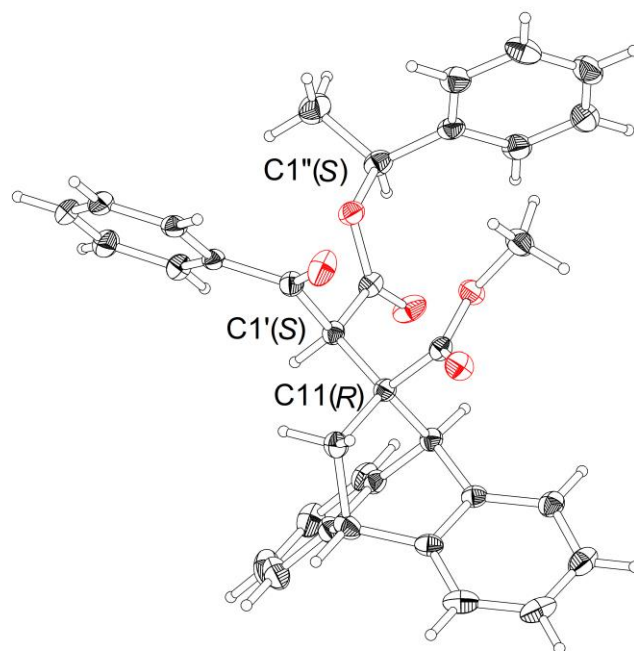

**Fig. 2S** Crystal structures of  $(-)-(1'S,1''S,11R)$ -**18a**; thermal ellipsoids are drawn at the 10% probability level.

**Table 1S** Crystallographic information for (–)-(1'S,1''R,11R)-**16a** and (–)-(1'S,1''S,11R)-**18a**

| Compound                                 | (–)-(1'S,1''R,11R)- <b>16a</b>                                          | (–)-(1'S,1''S,11R)- <b>18a</b>                                          |
|------------------------------------------|-------------------------------------------------------------------------|-------------------------------------------------------------------------|
| CCDC Number                              | CCDC 1873118                                                            | CCDC 1881998                                                            |
| Identification code                      | (–)-(1'S,1''R,11R)- <b>16a</b>                                          | (–)-(1'S,1''S,11R)- <b>18a</b>                                          |
| Empirical formula                        | C <sub>140</sub> H <sub>120</sub> O <sub>20</sub>                       | C <sub>7</sub> H <sub>6</sub> O <sub>5</sub>                            |
| Formula weight                           | 2122.35                                                                 | 530.59                                                                  |
| Temperature/K                            | 273.15                                                                  | 273.15                                                                  |
| Crystal system                           | monoclinic                                                              | orthorhombic                                                            |
| Space group                              | <i>P</i> 2 <sub>1</sub>                                                 | <i>P</i> 2 <sub>1</sub> 2 <sub>1</sub> 2 <sub>1</sub>                   |
| <i>a</i> /Å                              | 13.391(17)                                                              | 11.3620(4)                                                              |
| <i>b</i> /Å                              | 10.239(13)                                                              | 15.3627(7)                                                              |
| <i>c</i> /Å                              | 21.40(3)                                                                | 16.0741(7)                                                              |
| $\alpha$ /°                              | 90                                                                      | 90.00                                                                   |
| $\beta$ /°                               | 106.18(3)                                                               | 90.00                                                                   |
| $\gamma$ /°                              | 90                                                                      | 90.00                                                                   |
| Volume/Å <sup>3</sup>                    | 2817(6)                                                                 | 2805.8(2)                                                               |
| <i>Z</i>                                 | 1                                                                       | 4                                                                       |
| $\rho_{\text{calc}}$ /g/cm <sup>3</sup>  | 1.251                                                                   | 1.256                                                                   |
| $\mu$ /mm <sup>–1</sup>                  | 0.083                                                                   | 0.083                                                                   |
| <i>F</i> (000)                           | 1120.0                                                                  | 1120.0                                                                  |
| Crystal size/mm <sup>3</sup>             | 0.42 × 0.20 × 0.17                                                      | 0.5 × 0.42 × 0.38                                                       |
| Radiation                                | MoK $\alpha$ ( $\lambda$ = 0.71073)                                     | Mo K $\alpha$<br>( $\lambda$ = 0.71073)                                 |
| 2 $\theta$ range for data collection/°   | 4.178 to 42.356                                                         | 4.39 to 50.16                                                           |
| Reflections collected                    | 32630                                                                   | 20316                                                                   |
|                                          | 6020                                                                    | 4982                                                                    |
| Independent reflections                  | <i>R</i> <sub>int</sub> = 0.0900,<br><i>R</i> <sub>sigma</sub> = 0.1026 | <i>R</i> <sub>int</sub> = 0.0386,<br><i>R</i> <sub>sigma</sub> = 0.0374 |
| Data/restraints/parameters               | 6020/144/799                                                            | 4982/0/363                                                              |
| Goodness-of-fit on <i>F</i> <sup>2</sup> | 0.802                                                                   | 1.027                                                                   |

| Compound                                       | (-)-(1'S,1''R,11R)- <b>16a</b>   | (-)-(1'S,1''S,11R)- <b>18a</b>   |
|------------------------------------------------|----------------------------------|----------------------------------|
| Final R indexes [ $I \geq 2\sigma(I)$ ]        | $R_1 = 0.0410$ , $wR_2 = 0.0633$ | $R_1 = 0.0377$ , $wR_2 = 0.0862$ |
| Final R indexes [all data]                     | $R_1 = 0.0839$ , $wR_2 = 0.0717$ | $R_1 = 0.0557$ , $wR_2 = 0.0945$ |
| Largest diff. peak/hole / $e \text{ \AA}^{-3}$ | 0.10/-0.17                       | 0.25/-0.15                       |
| Flack parameter                                | 0.0(8)                           | -0.1(5)                          |
| Absolute structure determination               | Reference molecule               | Reference molecule               |

**Table 2S** Weak hydrogen bond in crystal structure of (-)-(1'S,1''R,11R)-**16a**.

| D-H...A              | $d \text{ D-H (\AA)}$ | $d \text{ D...A (\AA)}$ | $d \text{ D-H...A (\AA)}$ | $\angle \text{ D-H...A (}^\circ\text{)}$ |
|----------------------|-----------------------|-------------------------|---------------------------|------------------------------------------|
| C2B-H2B...O4A        | 0.93(1)               | 3.658(1)                | 2.780(1)                  | 157.8(7)                                 |
| C3B-H3B...O1A        | 0.93(1)               | 3.577(1)                | 2.759(8)                  | 147.2(3)                                 |
| C4''B-H4''B... $\pi$ | 0.93(1)               | 3.847(5)                | 2.994(3)                  | 153.3(7)                                 |

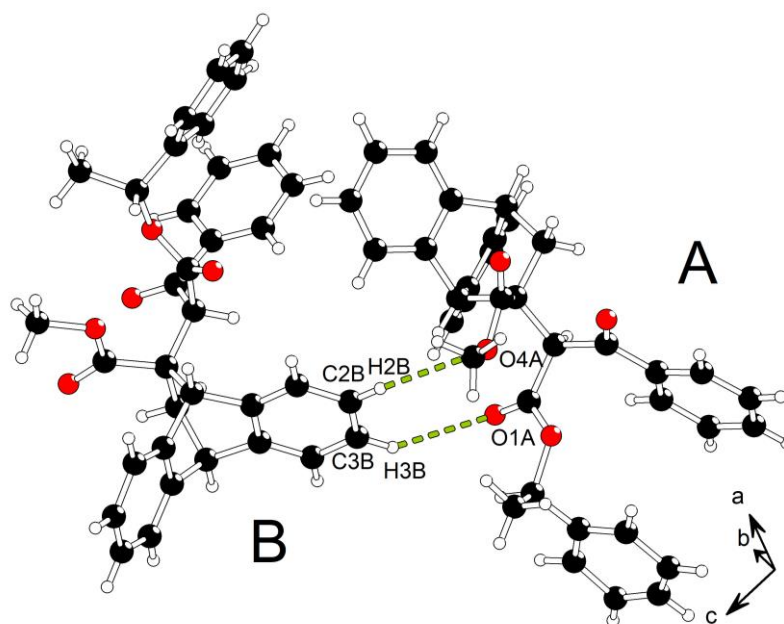**Fig. 3S** Intermolecular C-H...O hydrogen bond between the two conformers (**A** and **B**) in asymmetric unit of (-)-(1'S,1''R,11R)-**16a** represented by green dashed lines.

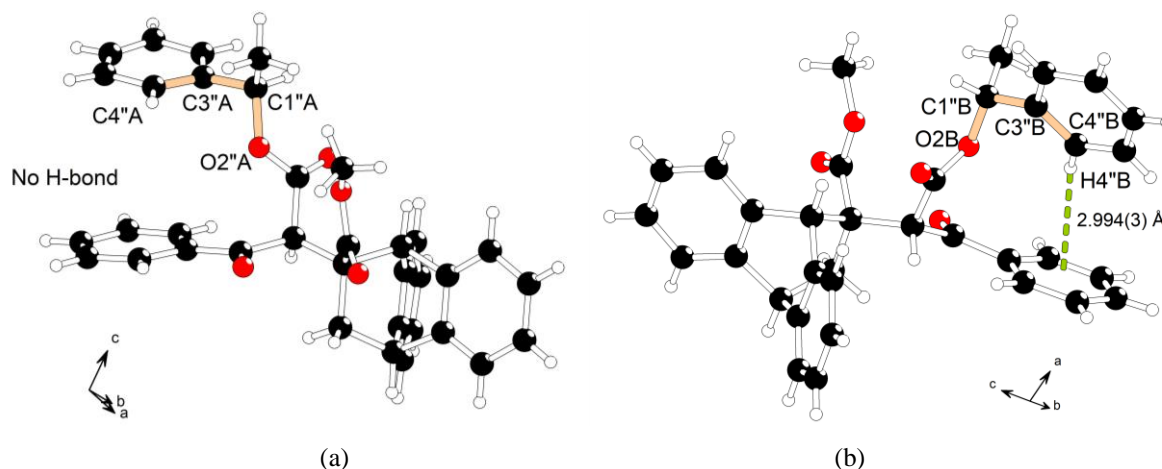

**Fig. 4S** Graphical representative of  $(-)-(1'S,1''R,11R)$ -**16a** (a) conformer A with torsion angle  $O2''A-C1''A-C3''A-C4''A$  of  $62.14^\circ$ , and (a) conformer B with torsion angle  $O2''B-C1''B-C3''B-C4''B$  of  $33.62^\circ$ . There is a C-H... $\pi$  bond (2.994 Å) observed in conformer B (green dashed line), but no C-H... $\pi$  bond in A.

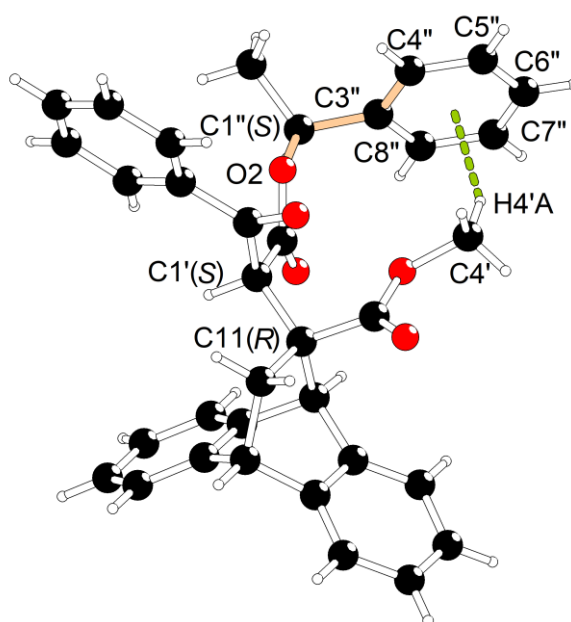

**Fig. 5S** Graphical representative of  $(-)-(1'S,1''S,11R)$ -**18a** showing C-H... $\pi$  bond (2.942 Å). Torsion angle of  $O2''-C1''-C3''-C4''$  is  $65.94^\circ$ .

#### Comments on CHECKCIF:

##### 1. Crystal structure of $(-)-(1'S,1''R,11R)$ -**16a**

##### Alert level A

1. [THETM01\\_ALERT\\_3\\_A](#) The value of  $\sin(\theta_{\max})/\lambda$  is less than 0.550  
Calculated  $\sin(\theta_{\max})/\lambda = 0.5083$

**Author Response:** This alert is due to low quality crystal that weakly diffracted. We have tried several times to get a good crystal for better diffraction data but unable to get it.

2. PLAT023\_ALERT\_3\_A Resolution (too) Low [ $\sin(\theta)/\lambda < 0.6$ ].. 21.18 Degree

**Author Response:** A full set of data was collected, however the very high angle data was poor and was omitted. This alert is due to low quality crystal that weakly diffracted. We have tried several times to get a good crystal for better diffraction data but unable to get it.

## Alert level B

1. PLAT089\_ALERT\_3\_B Poor Data / Parameter Ratio ( $Z_{\max} < 18$ ) ..... 4.05 Note

**Author Response:** A full set of data was collected, however the very high angle data was poor and was omitted. This is due to low quality crystal that weakly diffracted. We have tried several times to get a good crystal for better diffraction data but unable to get it.

2. PLAT234\_ALERT\_4\_B Large Hirshfeld Difference C3A --C3BA . 0.30 Ang

**Author Response:** This alert is generated due to severe disorder in the crystal.

3. PLAT340\_ALERT\_3\_B Low Bond Precision on C-C Bonds ..... 0.01343 Ang.

**Author Response:** This alert is also generated due to severe disorder in the crystal.

## 2. Crystal structure of $(-)-(1'S,1''S,11R)$ -18a

*There is no serious alert.*

## Solvent effect of diastereomers KAA esters (16a-b and 18a-b)

We tested the influence of the NMR spectroscopic solvents by changing the solvent such as less polar or more polarity than  $\text{CDCl}_3$ , it will affect the  $\Delta\delta^{RS}$  values.<sup>5</sup> Unfortunately, some compounds are not soluble in methanol- $d_4$  so we used acetone- $d_6$  ( $\epsilon$  20.7)<sup>6</sup> instead because for the diastereomers KAAs (**16a-b** and **18a-b**) dissolve very well. The chemical shift difference ( $\Delta\delta^{RS}$ ) of each substituent can be calculated explicitly from  $\Delta\delta^{RS}(L_1/L_2) = \delta_{L_1/L_2}(11R)_{\text{KAA}} - \delta_{L_1/L_2}(11S)_{\text{KAA}}$ . As summarized below, the  $\Delta\delta^{RS}$  values of KAA ester (**16a-b**, **18a-b**) in acetone- $d_6$  were greater, especially H-1'' position and also have the same pattern as those obtained in  $\text{CDCl}_3$  as depicted in Fig. 6s and 7S.

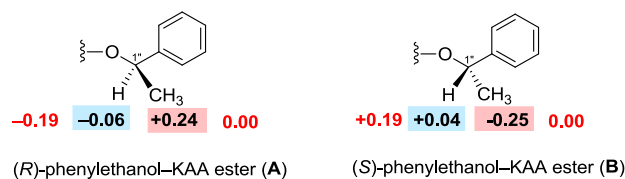

**Fig. 6S** Comparison of the selected  $\Delta\delta^{RS}$  values of  $(R)$ - and  $(S)$ -phenylethanol KAA esters obtained in both NMR solvents:  $\text{CDCl}_3$  (**bold black colour**) and acetone- $d_6$  (**bold red colour**).

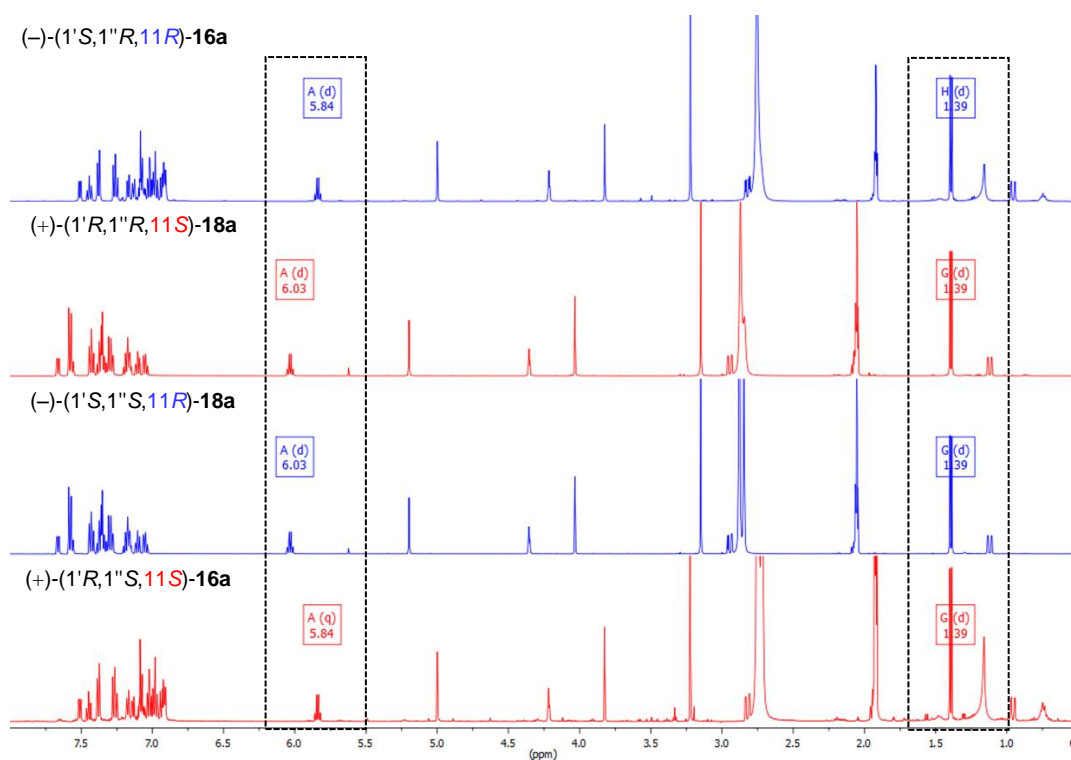

**Fig. 7S** Comparison of the  $^1\text{H}$ -NMR spectra of (*R*)- and (*S*)-phenylethanol KAA esters in acetone- $d_6$ .

#### Racemization study of all diastereomers KAA esters [(16a-b, 18a-b) and (21a–24a)]

The solution of all diastereomers KAA esters (**16a-b**, **18a-b**) and (**21a–24a**) (5-7 mg) in  $\text{CDCl}_3$  (0.8 mL) were characterized by  $^1\text{H}$ -NMR (500 MHz) technique in different period of times (first attempt and second attempt (24 hours later) and then the  $^1\text{H}$  NMR data were collected, so we achieved the same spectra for each compound even in the different dates. The results obviously revealed that all  $^1\text{H}$ -NMR spectra have exhibited the same signals as found in the beginning and the racemization of KAA esters was not occurred.



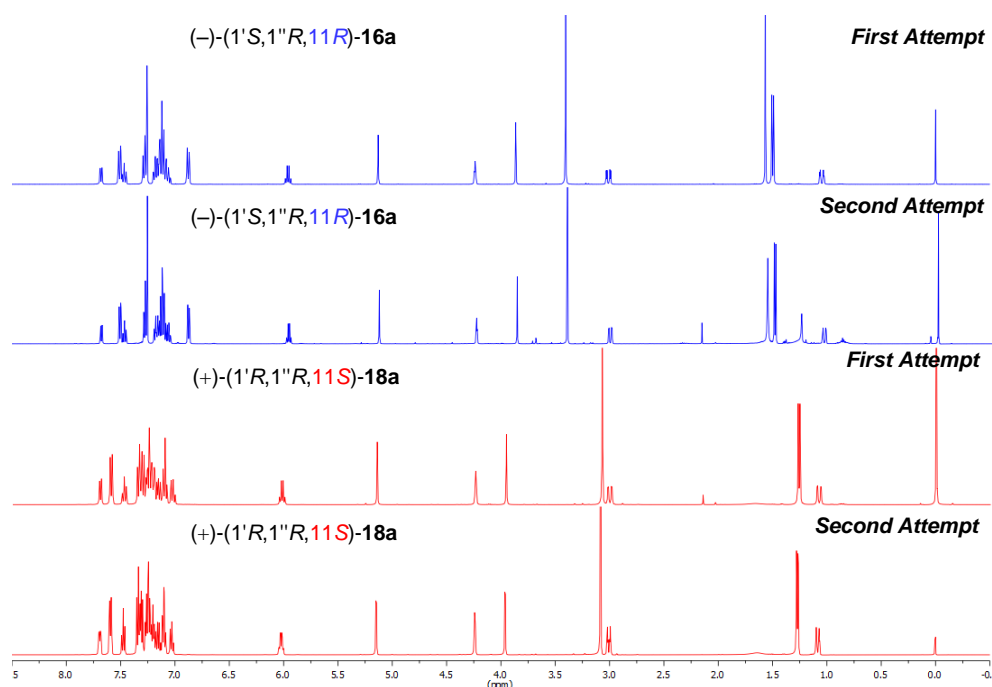

**Fig. 8S** Comparison of the  $^1\text{H}$ -NMR spectra of (*R*)-phenylethanol KAA esters in different time periods.

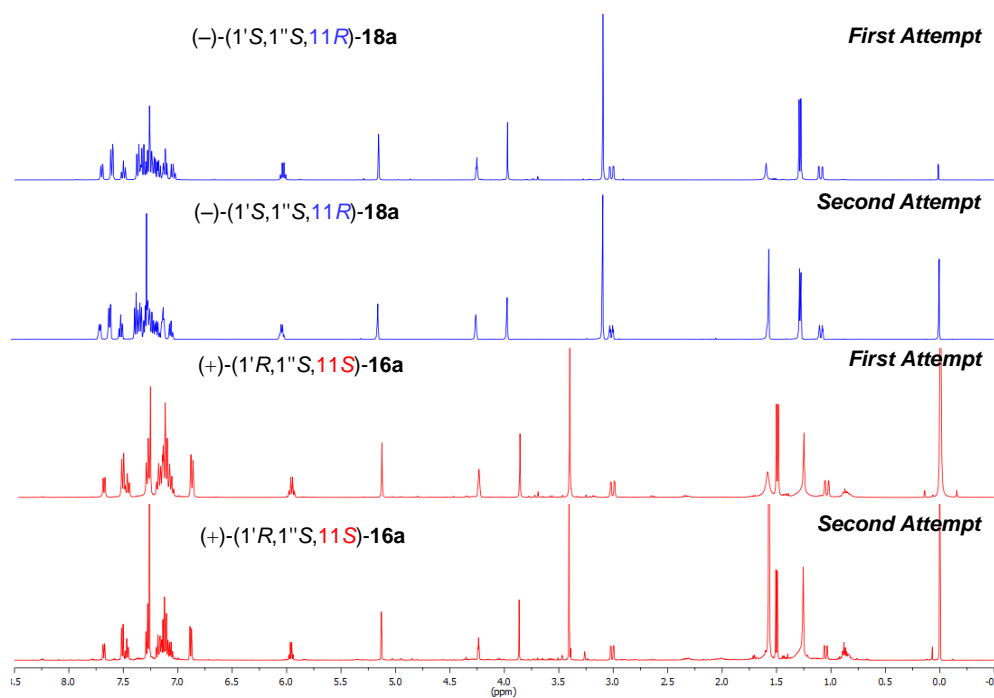

**Fig. 9S** Comparison of the  $^1\text{H}$ -NMR spectra of (*S*)-phenylethanol KAA esters in different time periods.

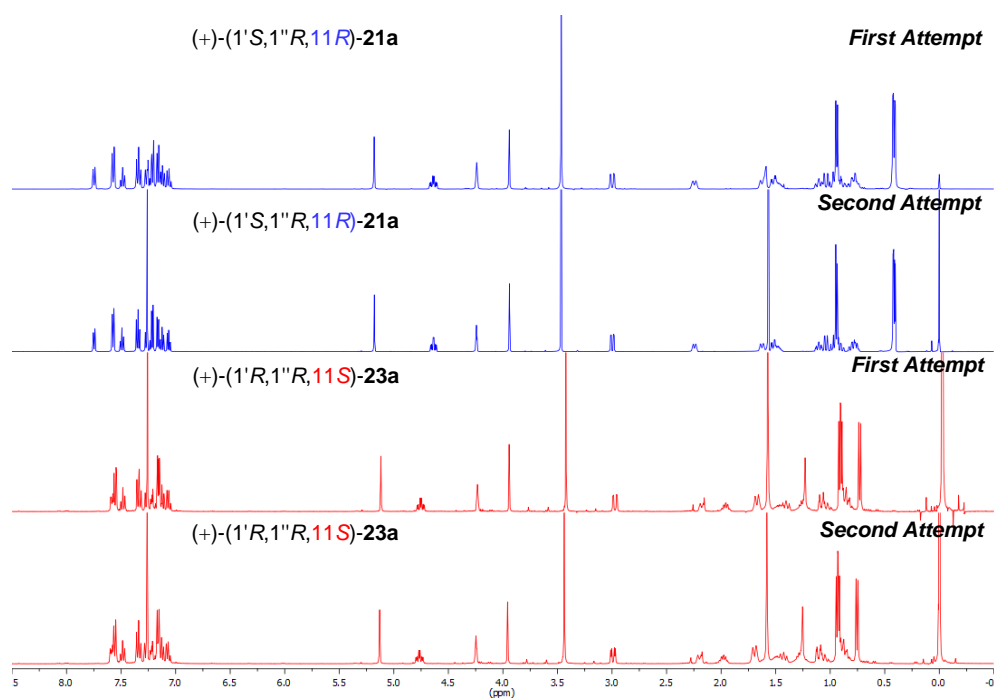

**Fig. 10S** Comparison of the  $^1\text{H}$ -NMR spectra of  $(-)$ -menthol KAA esters in different time periods.

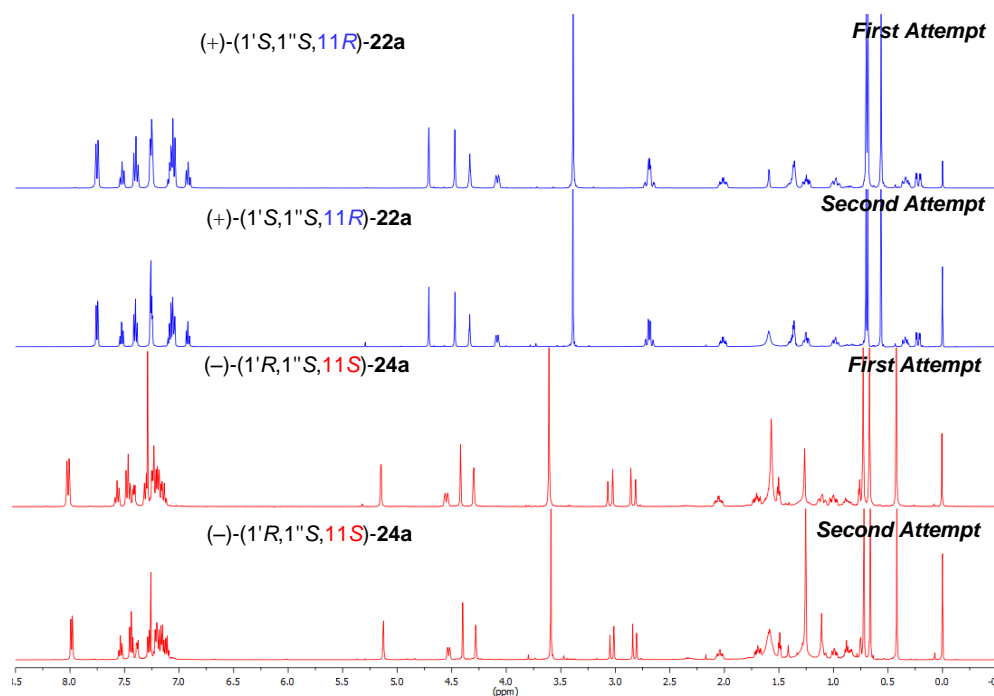

**Fig. 11S** Comparison of the  $^1\text{H}$ -NMR spectra of  $(-)$ -borneol KAA esters in different time periods.

**References**

1. G. Sheldrick, *Acta. Cryst., Section A* 2015, **71**, 3–8.
2. (a) O. V. Dolomanov, L. J. Bourhis, R. J. Gildea, J. A. K. Howard and H. Puschmann, *J. Appl. Cryst.*, 2009, **42**, 339–341., 2009, **42**, 339–341; (b) G. Sheldrick, *Acta. Cryst., Section C*, 2015, **71**, 3–8.
3. P. Kongsaree, P. Meepowpan and Y. Thebtaranonth, *Tetrahedron: Asymmetry*, 2001, **12**, 1913–1922.
4. H. D. Flack and G. Bernardinelli, *Acta Crystallogr. Sect. A Found. Crystallogr.*, 1999, **55**, 908–915.
5. S.-Y. Han and K. Choi, *Euro. J. Org. Chem.* **2011**, 2920–2923.
6. NMR Solvent Data Chart, Cambridge Isotope Laboratories, Inc., Andover, MA.

**$^1\text{H}$ -NMR and  $^{13}\text{C}$ -NMR spectra of  
compounds 9–24**

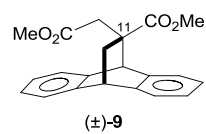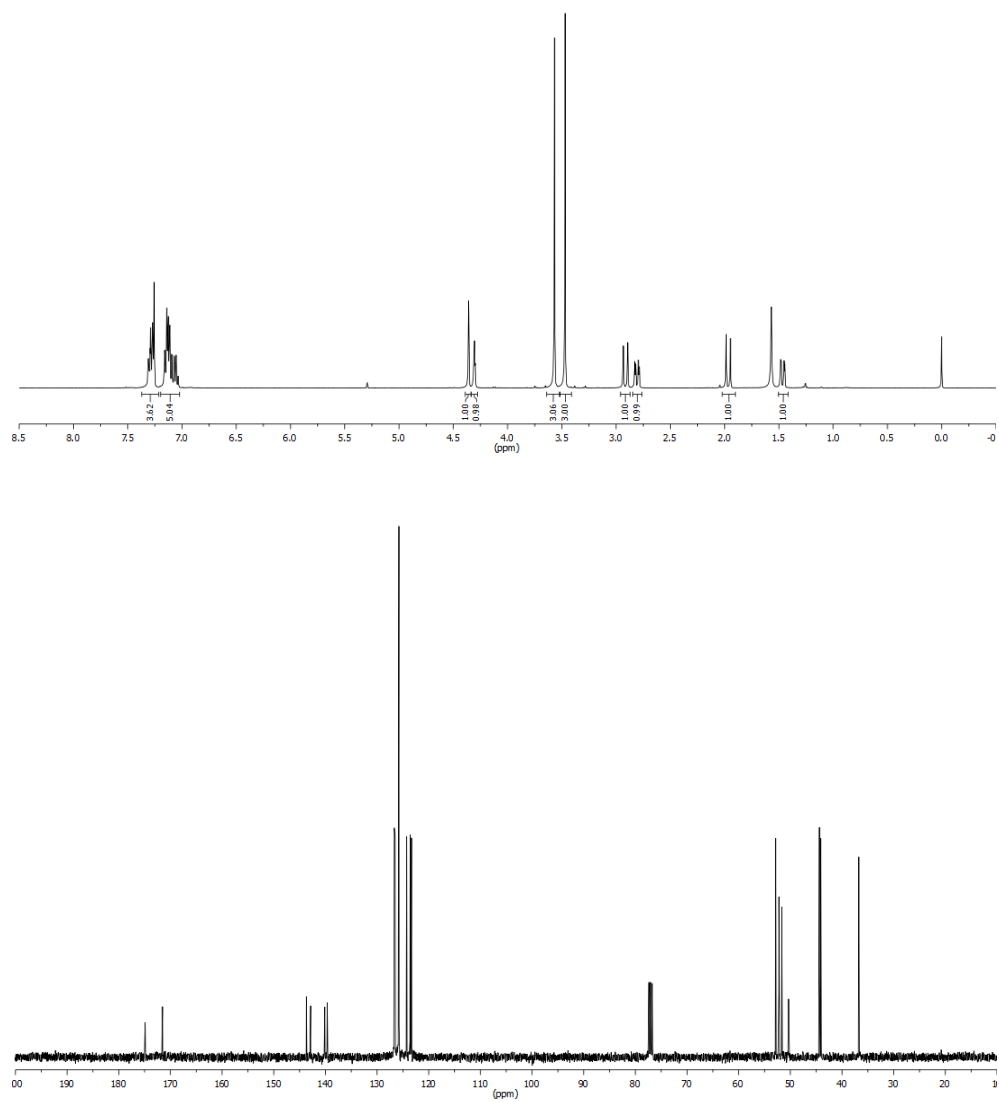

**Fig. 12S** 11-Carbomethoxy-11-(1'-carbomethoxymethyl)-9,10-dihydro-9,10-ethanoanthracene ((±)-**9**).

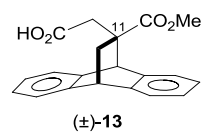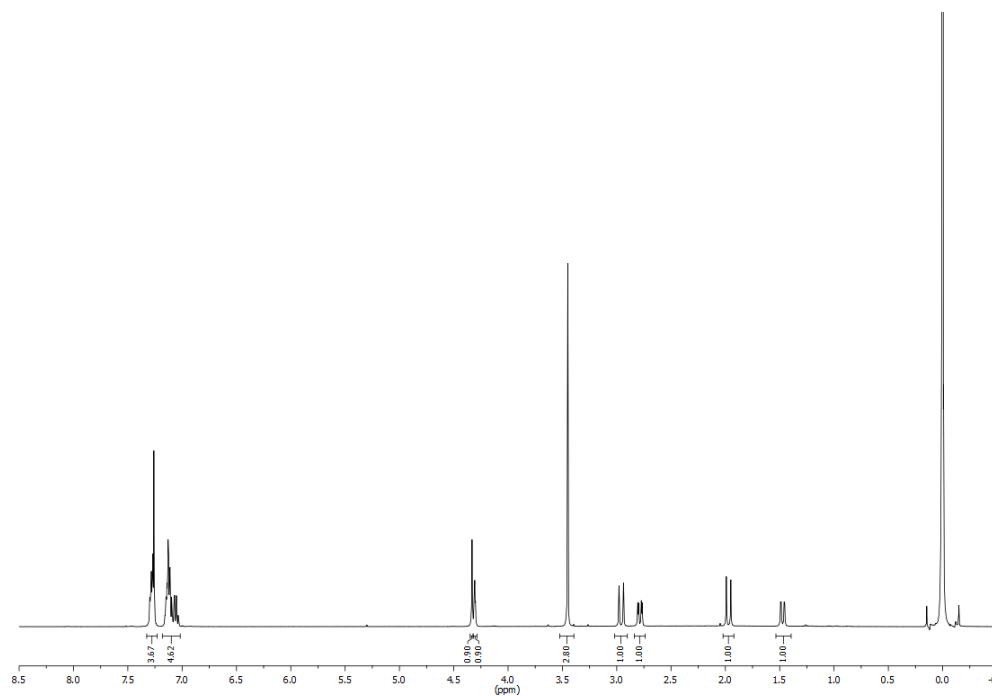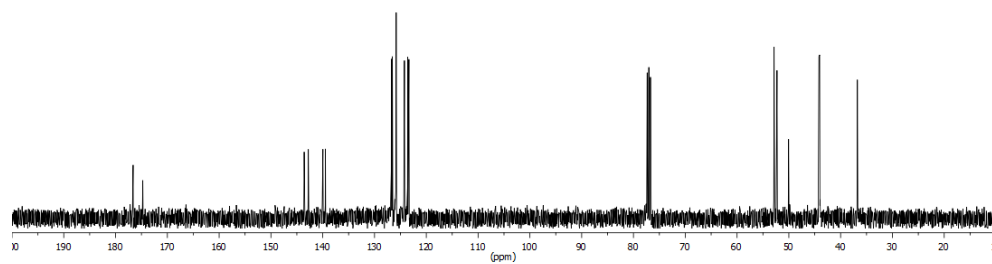

**Fig. 13S** 11-Carbomethoxy-11-(1'-carboxymethyl)-9,10-dihydro-9,10-ethanoanthracene ((±)-**13**).

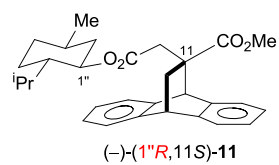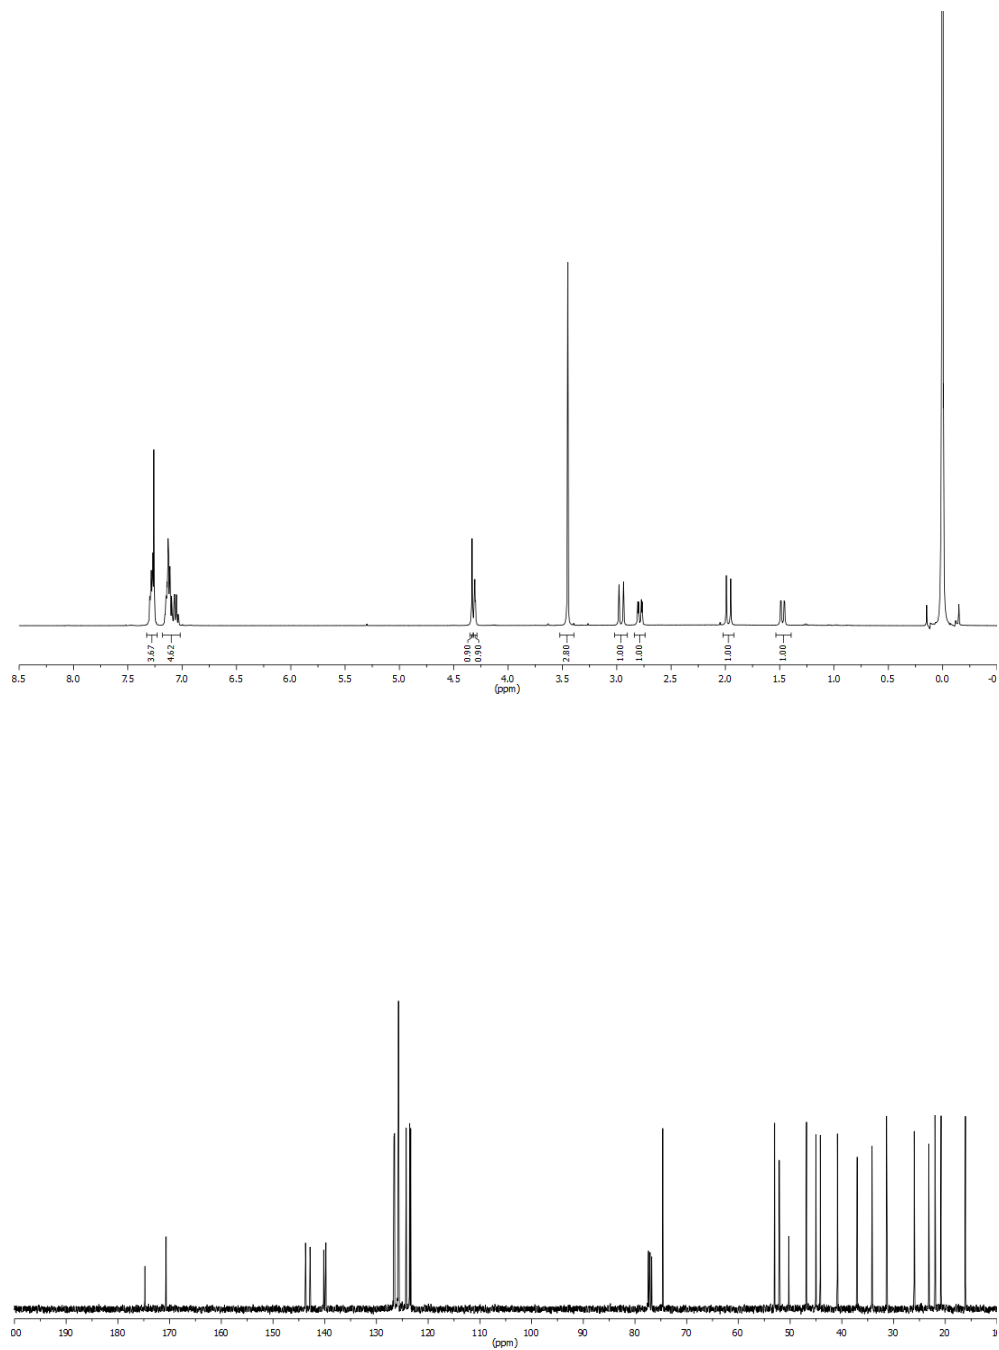

**Fig. 14S** 11-Carbomethoxy-11-[(-)-menthoxyacetyl]-9,10-dihydro-9,10-ethanoanthracene ((-)-(1'',11*S*)-11).

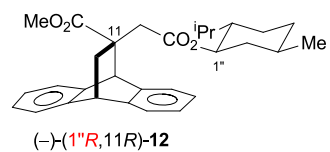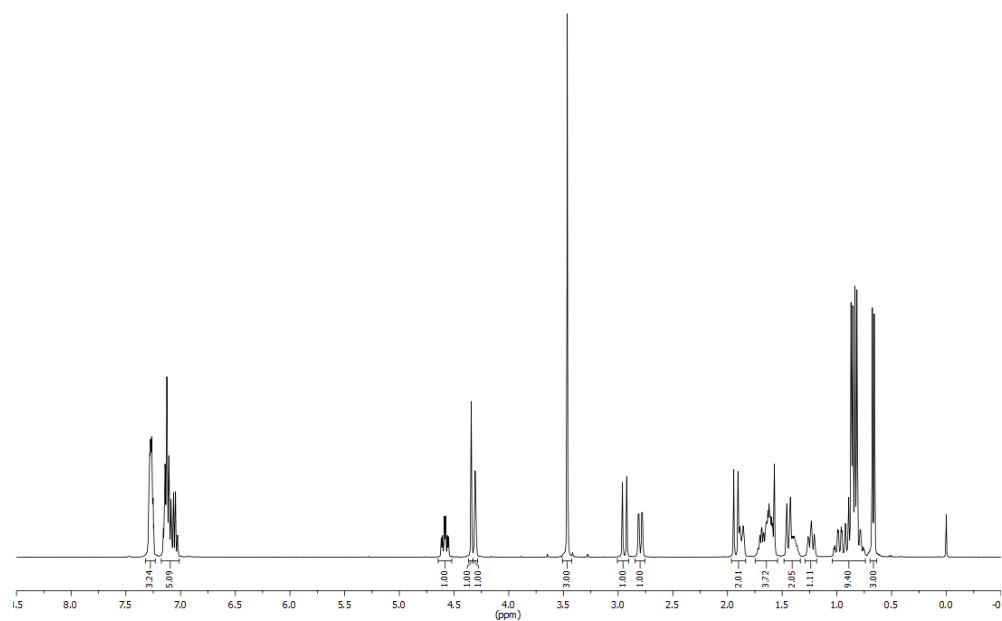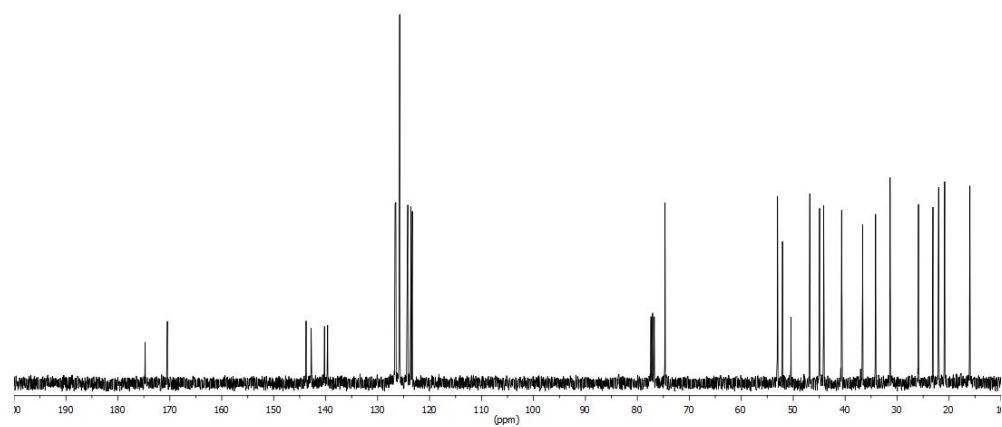

**Fig. 15S** 11-Carbomethoxy-11-[(*-*)-menthoxyacetyl]-9,10-dihydro-9,10-ethanoanthracene ((-)-(1'',11*R*)-**12**).



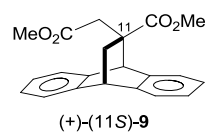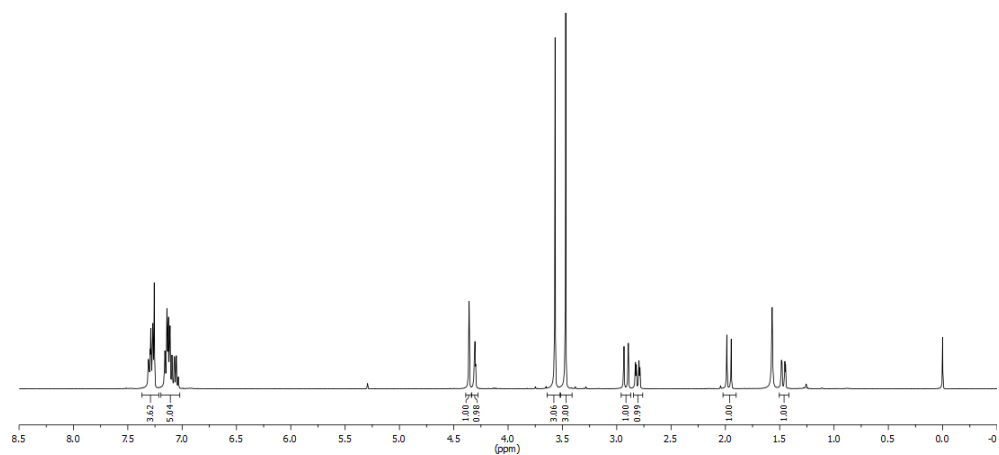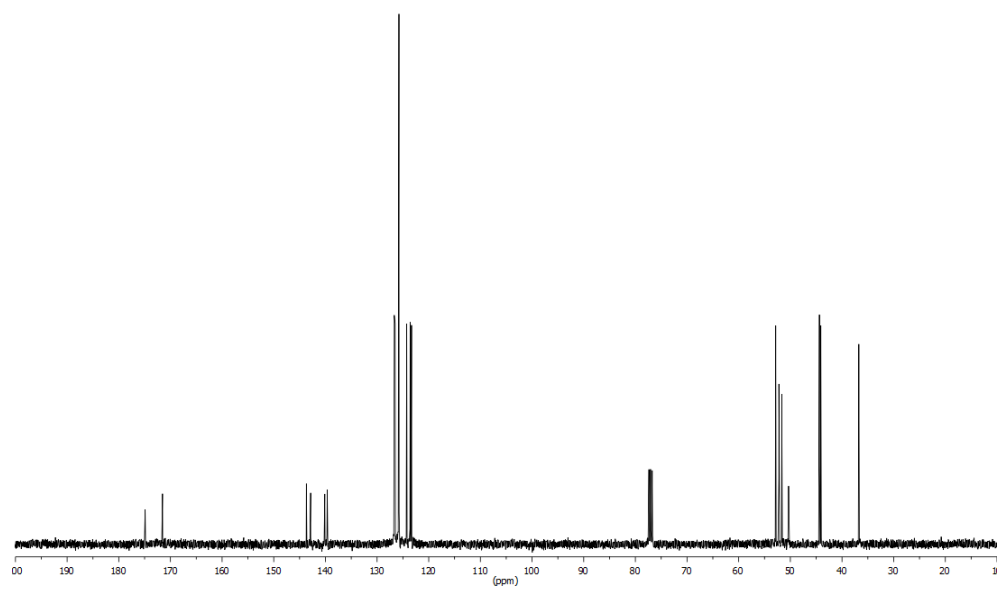

**Fig. 16S** 11-Carbomethoxy-11-(1'-carbomethoxymethyl)-9,10-dihydro-9,10-ethanoanthracene ((+)-(11S)-9).

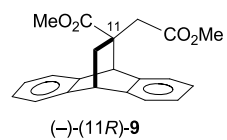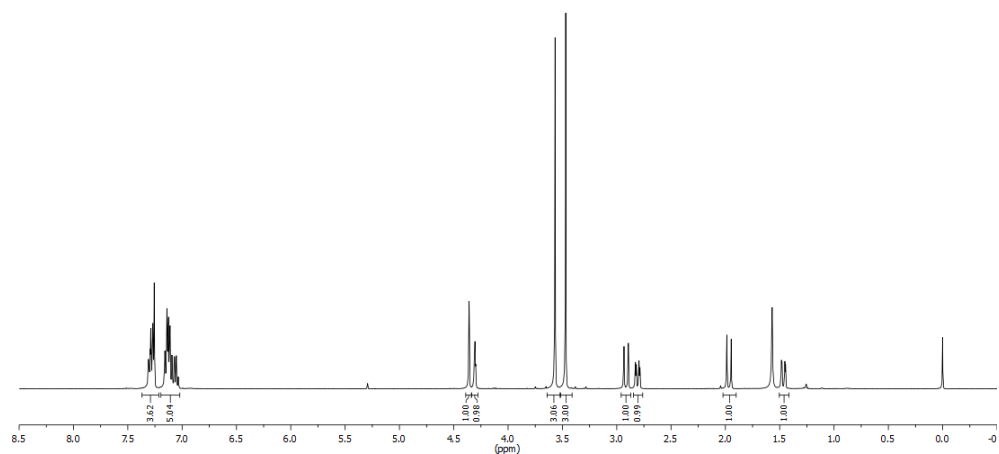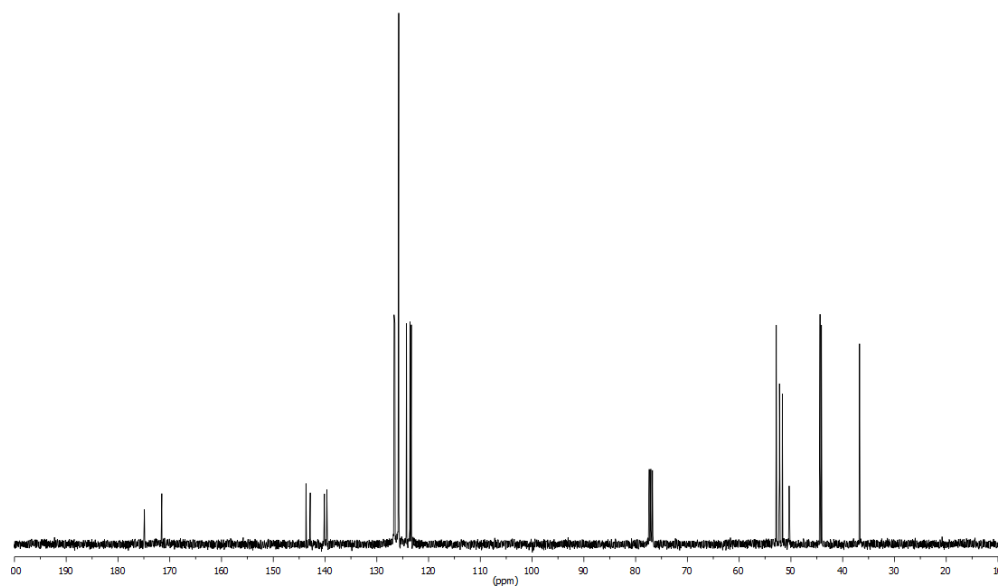

**Fig. 17S** 11-Carbomethoxy-11-(1'-carbomethoxymethyl)-9,10-dihydro-9,10-ethanoanthracene ((-)-(11*R*)-**9**).

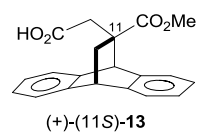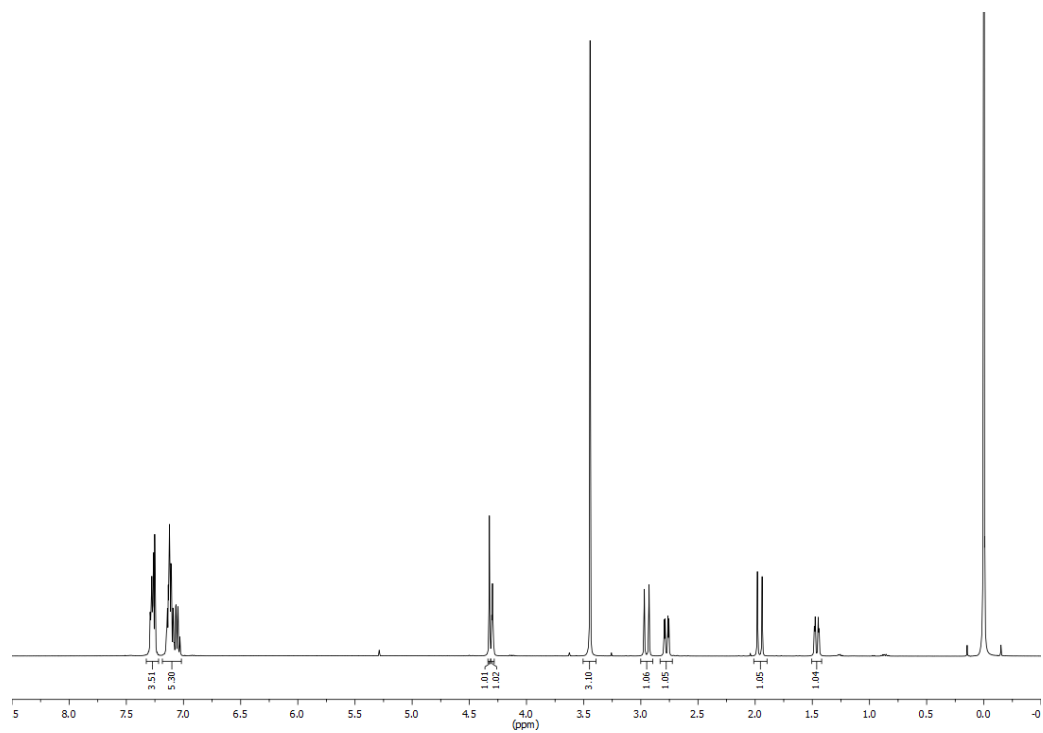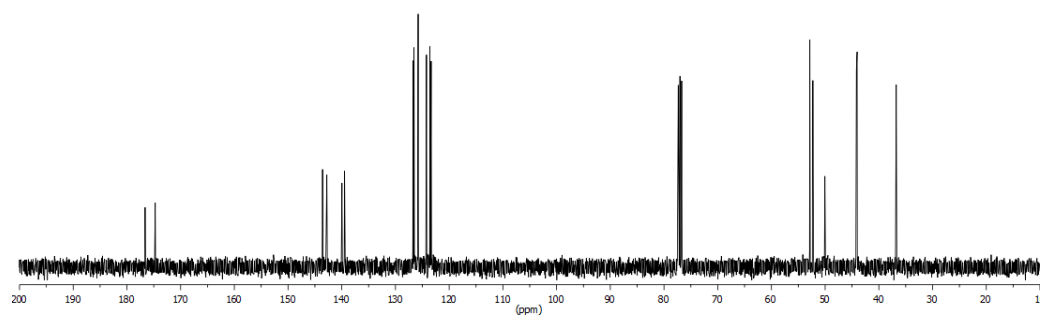

**Fig. 18S** 11-Carbomethoxy-11-(1'-carboxymethyl)-9,10-dihydro-9,10-ethanoanthracene ((+)-(11S)-**13**).

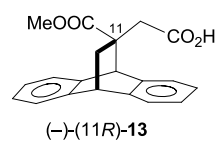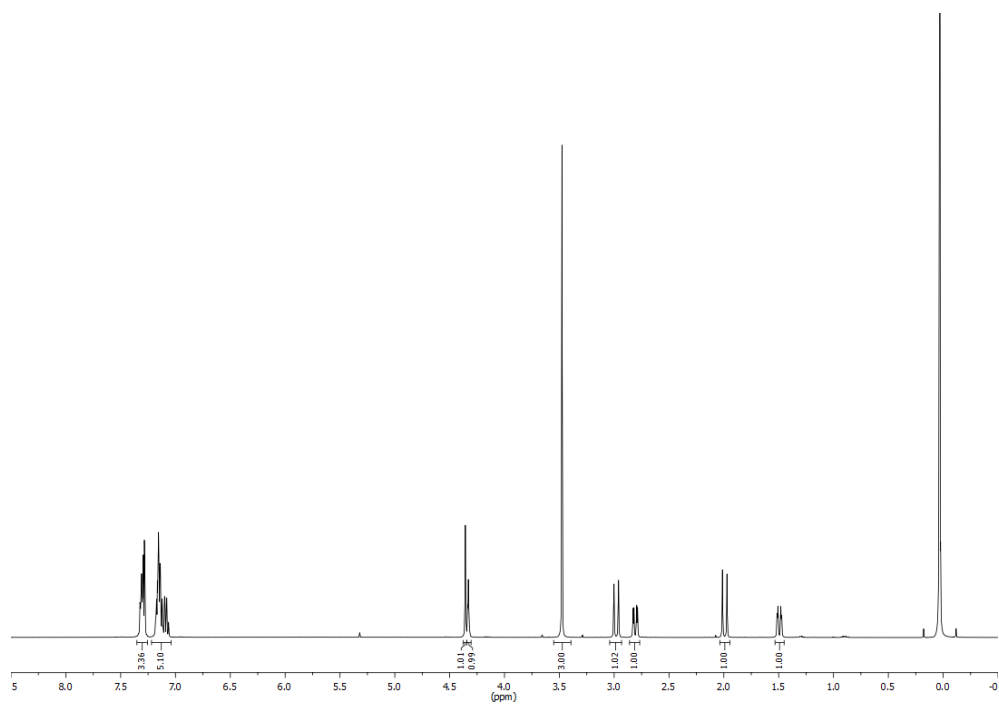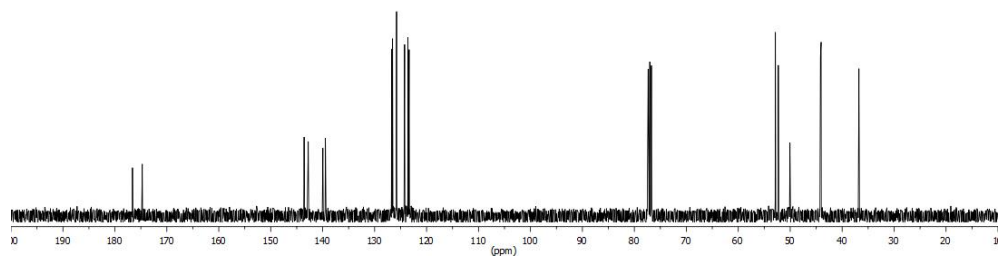

**Fig. 19S** 11-Carbomethoxy-11-(1'-carboxymethyl)-9,10-dihydro-9,10-ethanoanthracene ((-)-(11*R*)-**13**).

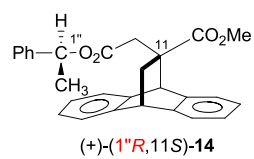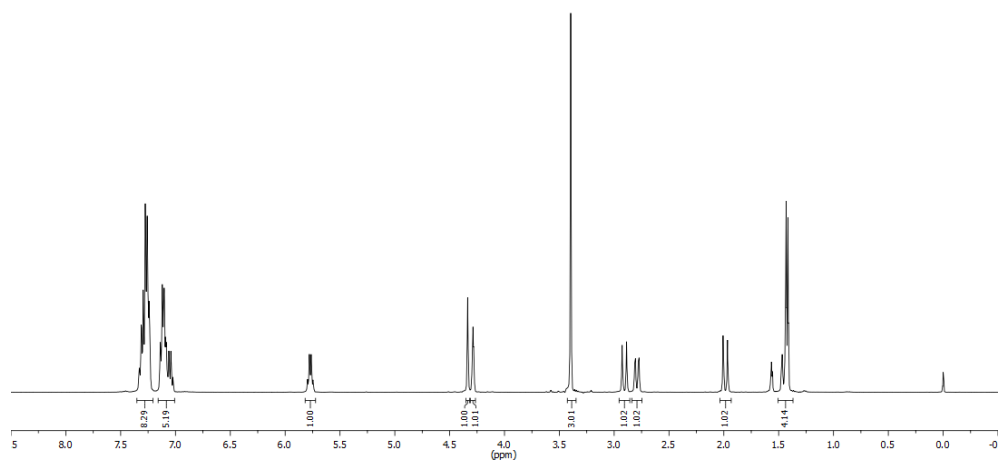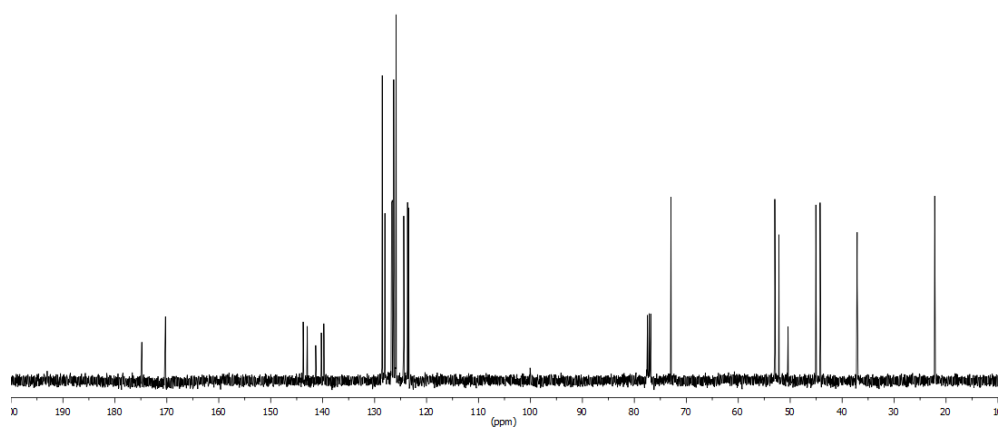

**Fig. 20S** 11-Carbomethoxy-11-(1'-carboxymethyl)-9,10-dihydro-9,10-ethanoanthracene ((+)-(1'*R*,11*S*)-**14**).

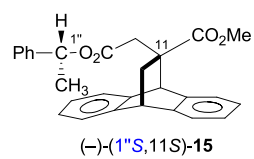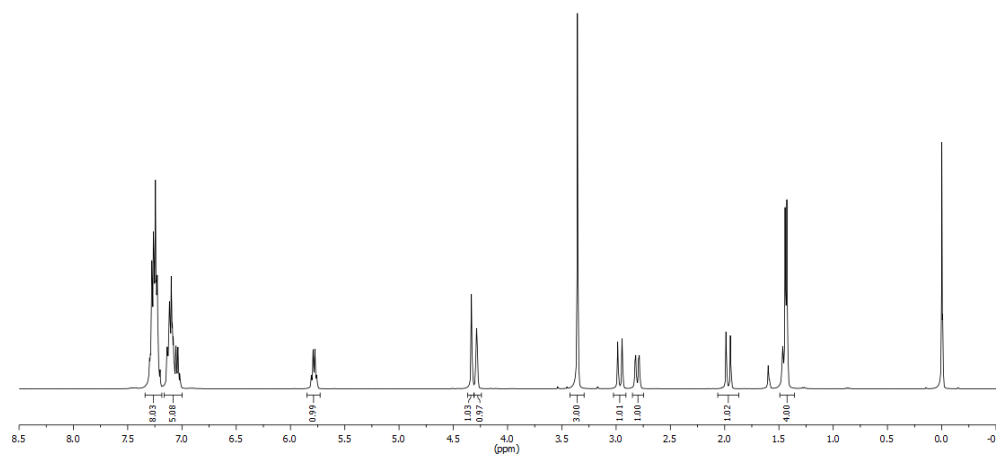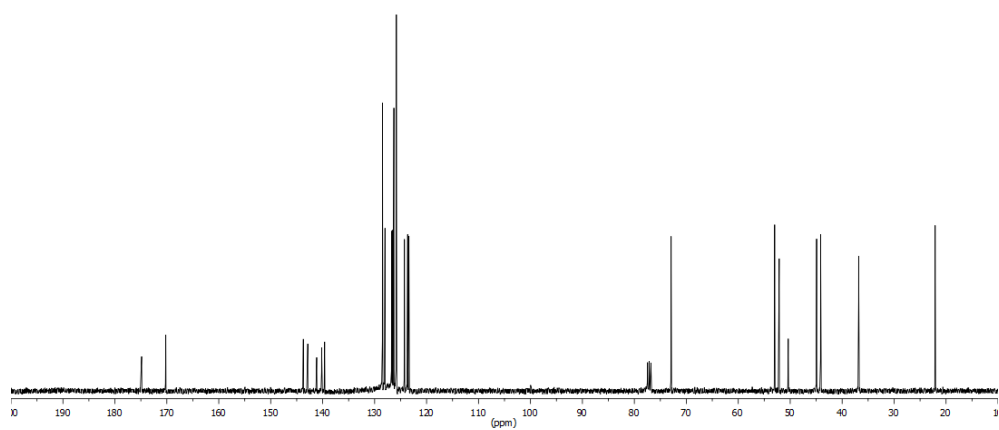

**Fig. 21S** 11-Carbomethoxy-11-(1'-carbo-(1"-phenylethoxy)methyl)-9,10-dihydro-9,10-ethanoanthracene ((-)-(1'S,11S)-**15**).

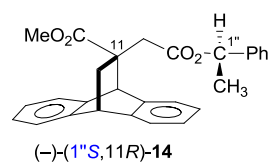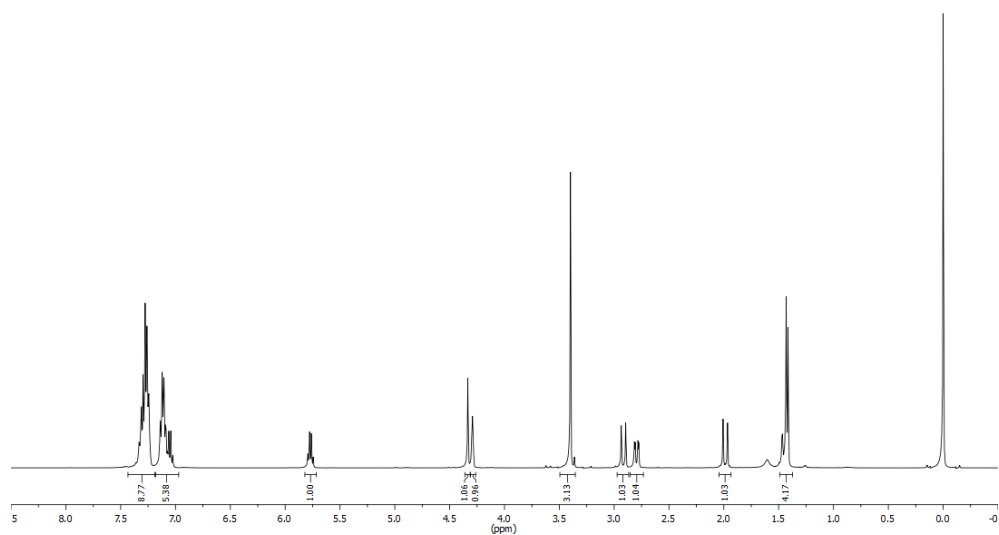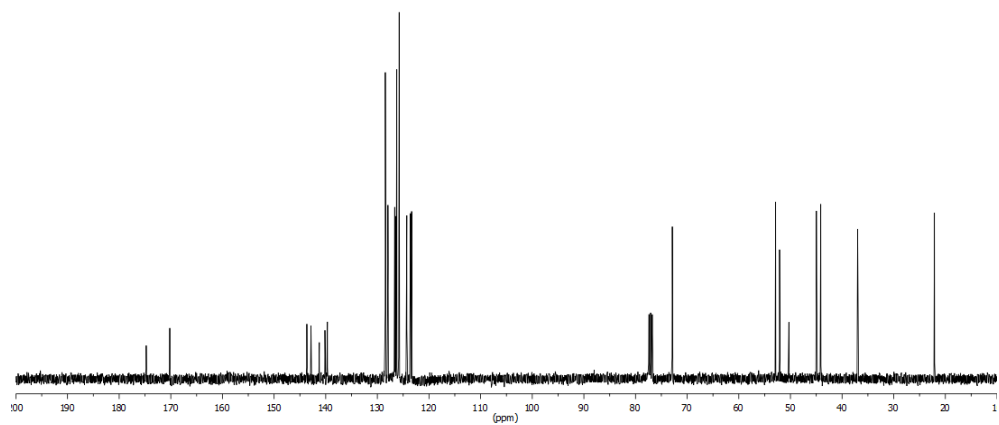

**Fig. 22S** 11-Carbomethoxy-11-(1'-carbo-(1''-phenylethoxy)methyl)-9,10-dihydro-9,10-ethanoanthracene ((-)-(1''S,11R)-14).

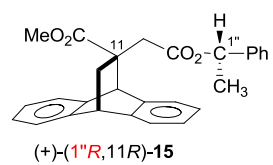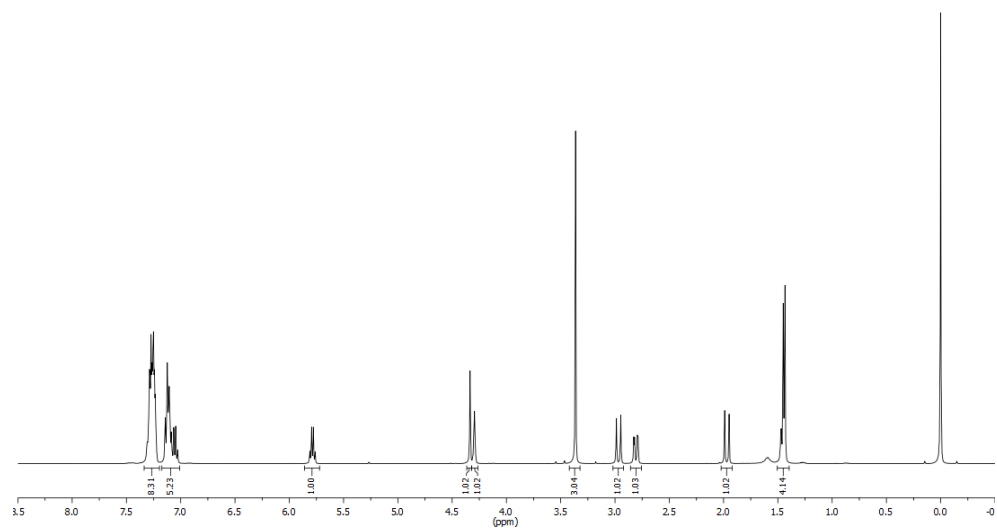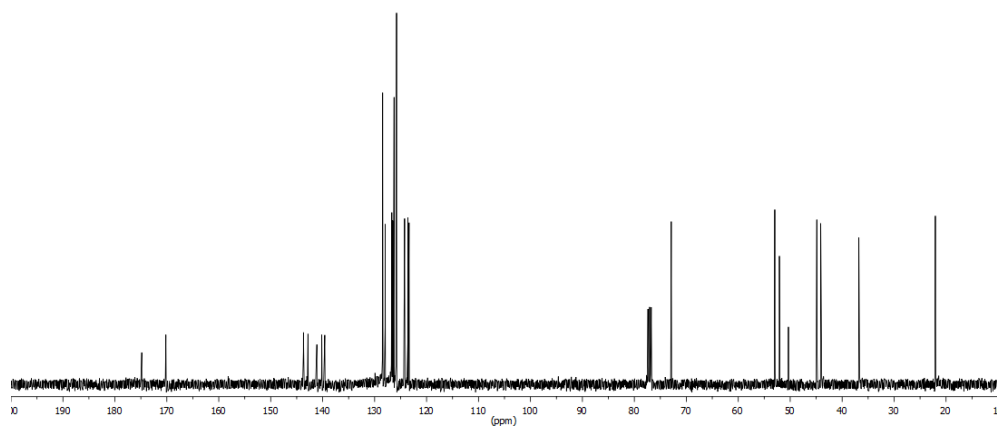

**Fig. 23S** 11-Carbomethoxy-11-(1'-carbo-(1''-phenylethoxy)methyl)-9,10-dihydro-9,10-ethanoanthracene ((+)-(1''*R*,11*R*)-**15**).



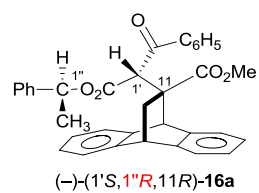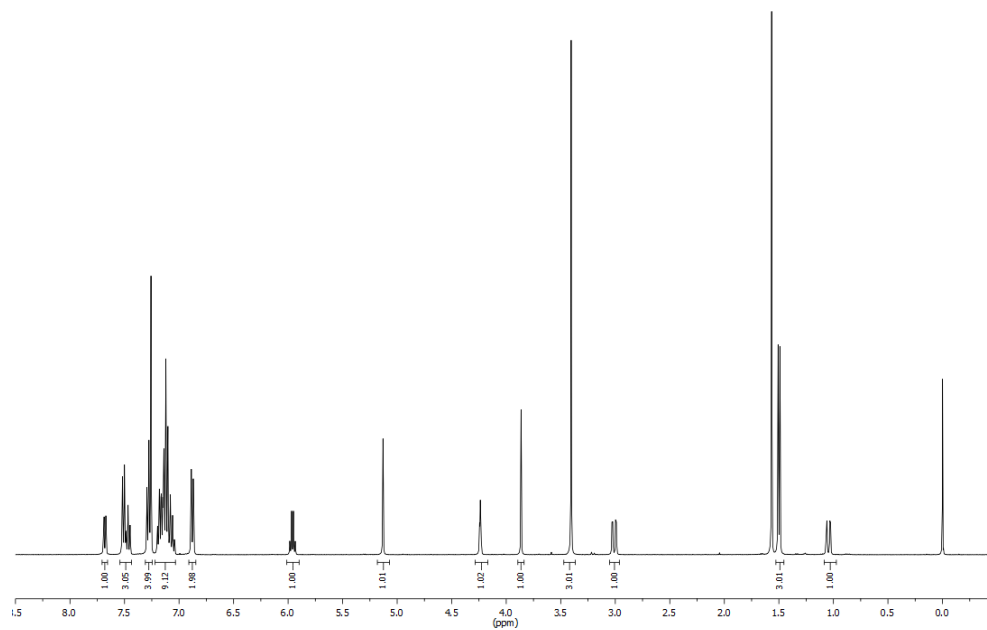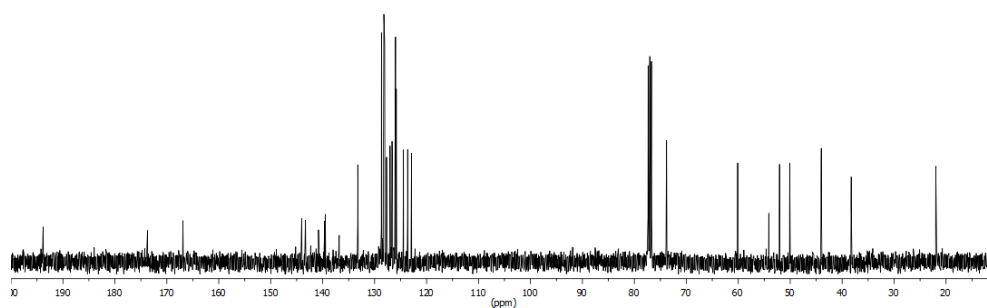

**Fig. 24S** 11-carbomethoxy-11-(1'-benzoyl or naphthoyl)-1''-carbo-(1''-phenylethoxy)methyl-9,10-dihydro-9,10-ethanoanthracene ((-)-(1'S,1''R,11R)-**16a**).

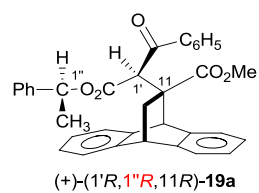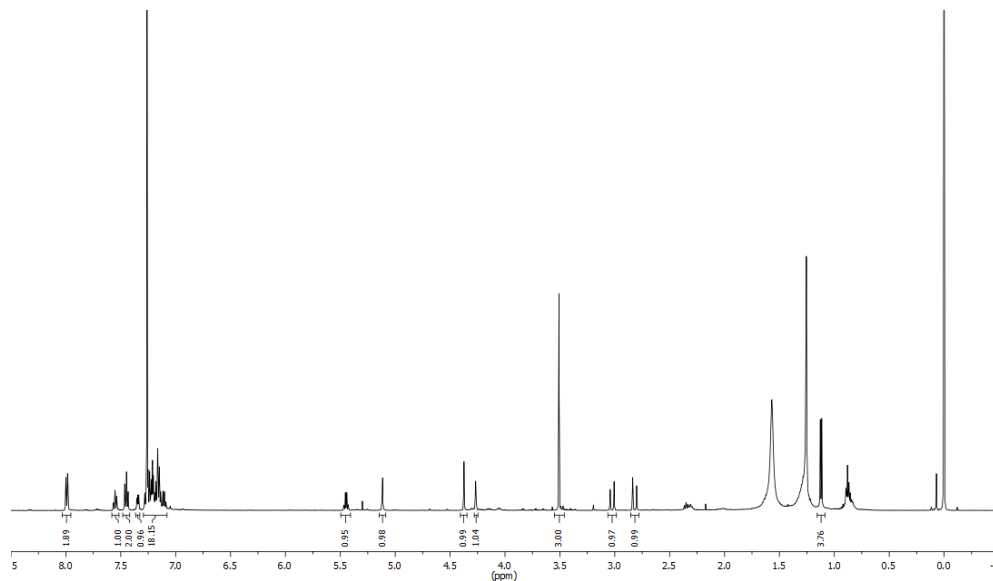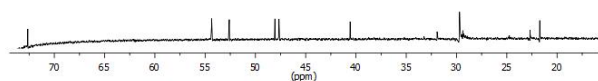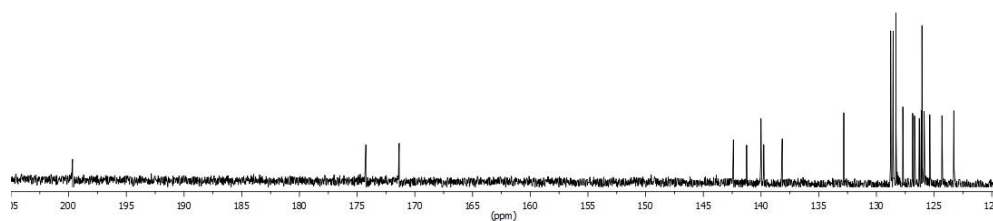

**Fig. 25S** 11-carbomethoxy-11-(1'-benzoyl or naphthoyl-1'-carbo-(1''-phenylethoxy)methyl)-9,10-dihydro-9,10-ethanoanthracene ((+)-(1'*R*,1''*R*,11*R*)-**19a**).

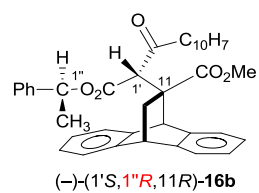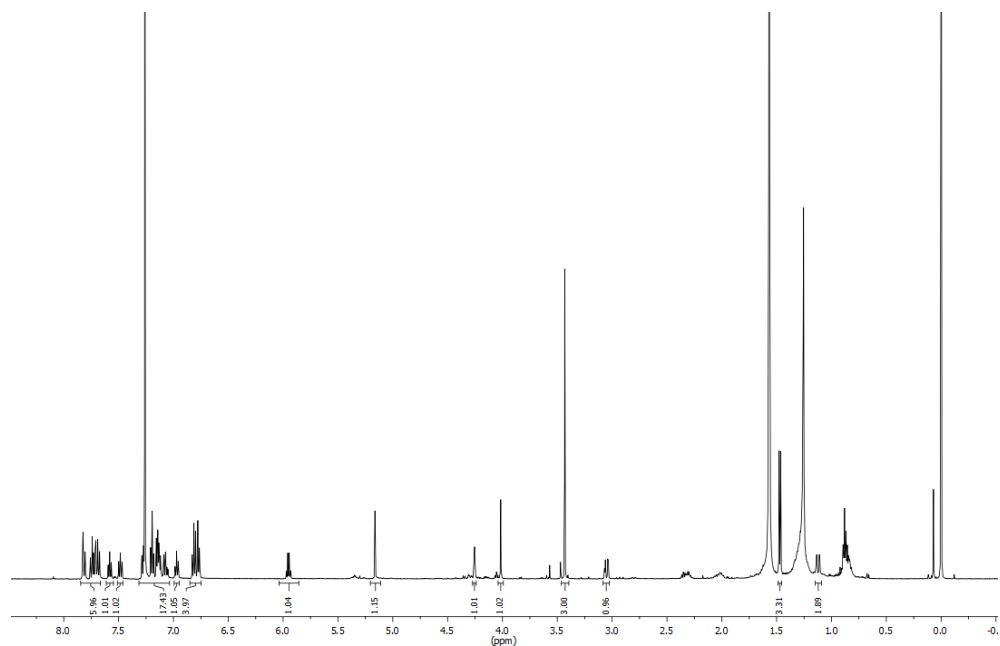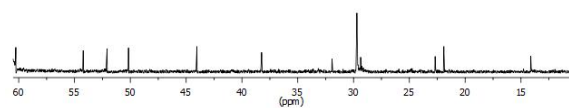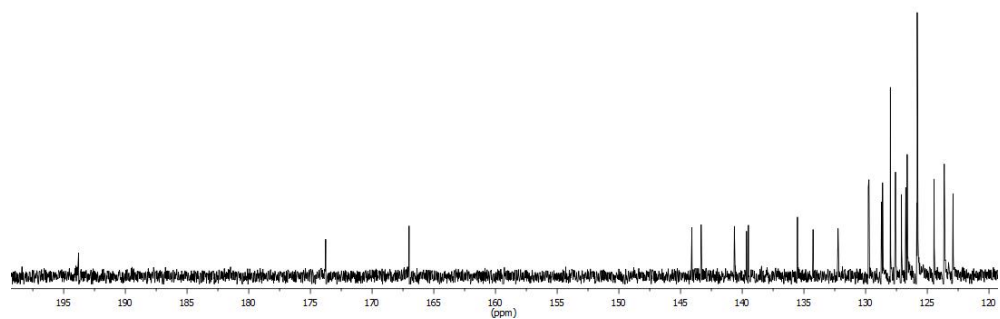

**Fig. 26S** 11-Carbomethoxy-11-(1'-naphthoyl-1'-carbo-(1''-phenylethoxy)methyl)-9,10-dihydro-9,10-ethanoanthracene ((-)-(1'S,1''R,11R)-**16b**).

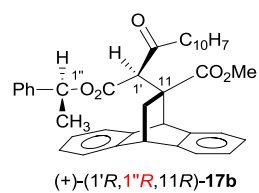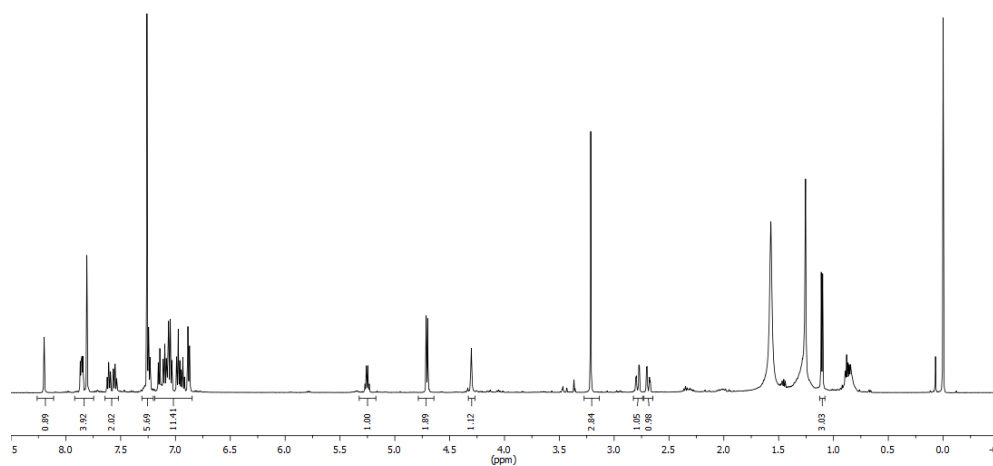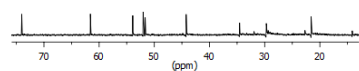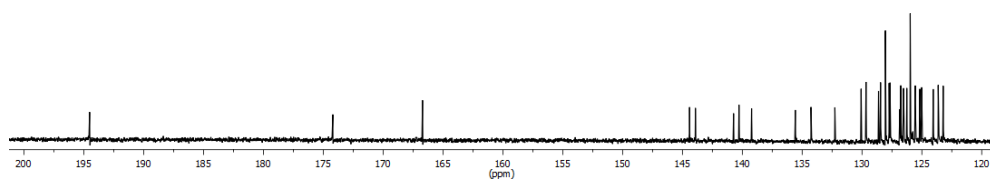

**Fig. 27S** 11-Carbomethoxy-11-(1'-naphthoyl-1'-carbo-(1''-phenylethoxy)methyl)-9,10-dihydro-9,10-ethanoanthracene ((+)-(1'*R*,1''*R*,11*R*)-**17b**).

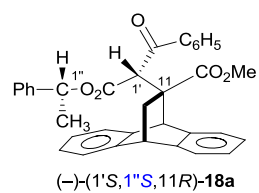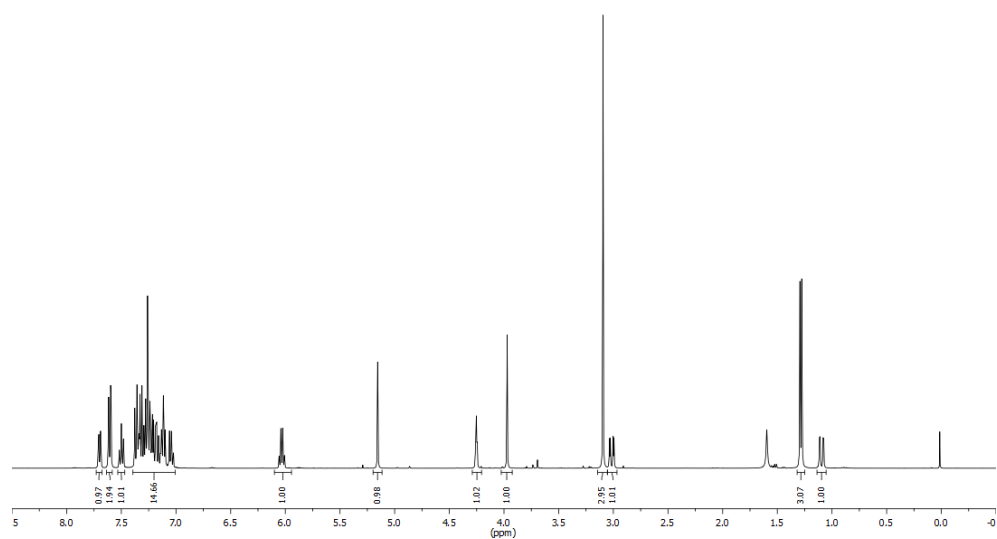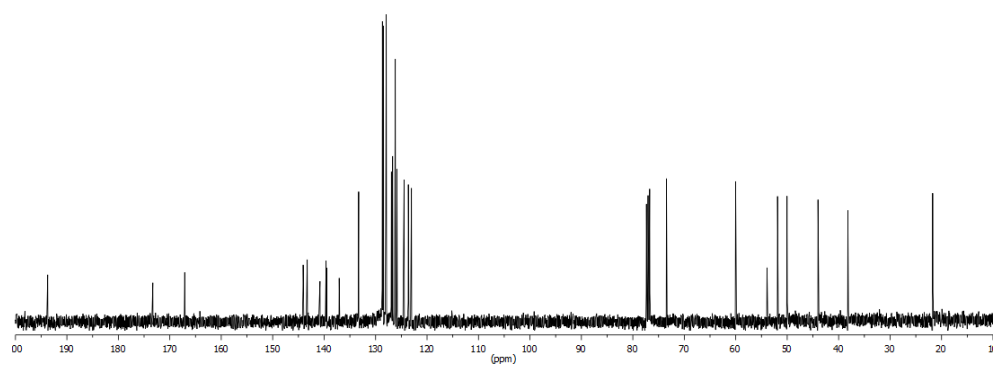

**Fig. 28S** 11-(Carbomethoxy)-(1'-benzoyl-1'-carbo-(1''-phenylethoxy)methyl)-9,10-dihydro-9,10-ethanoanthracene ((-)-(1'S,1''S,11R)-**18a**).

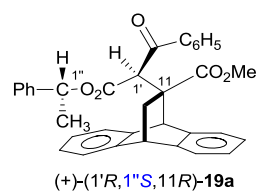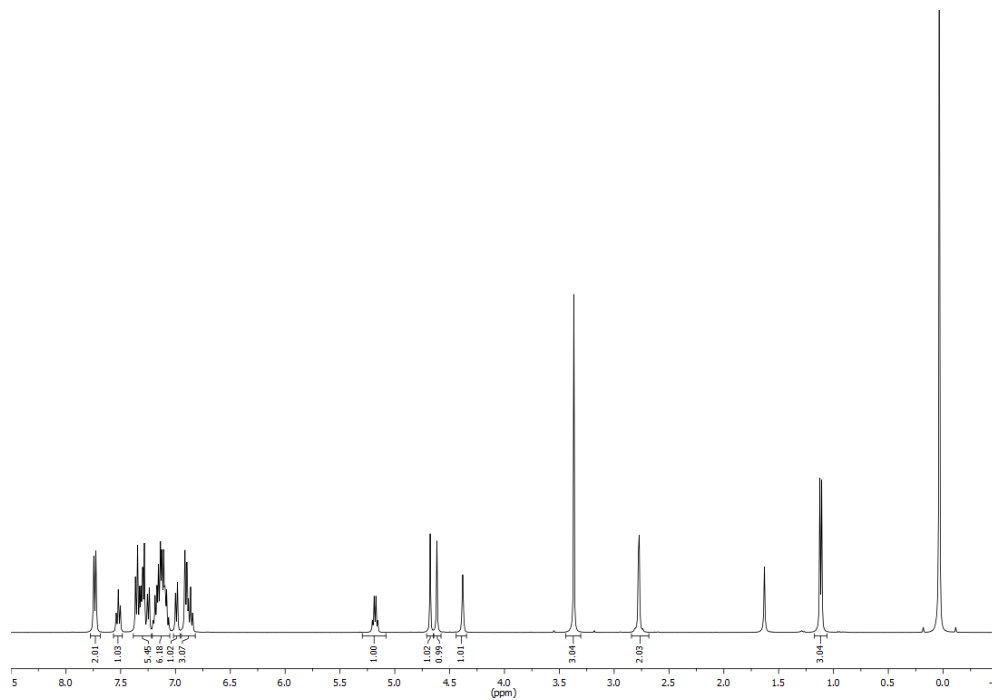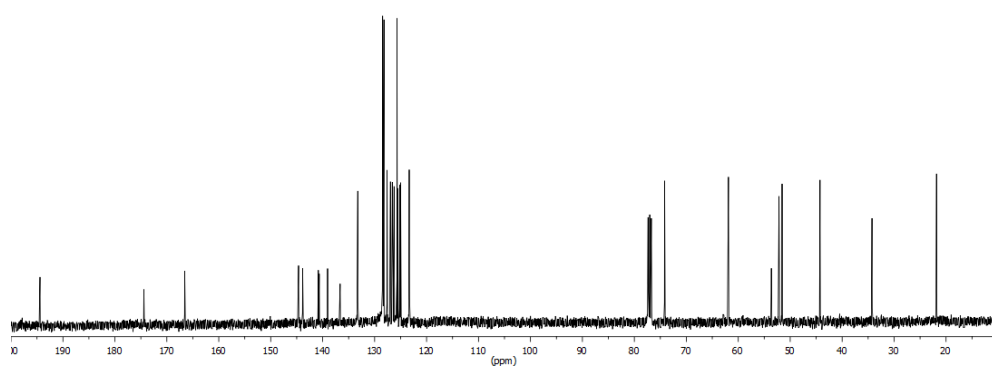

**Fig. 29S** 11-(Carbomethoxy)-(1'-benzoyl-1'-carbo-(1''-phenylethoxy)methyl)-9,10-dihydro-9,10-ethanoanthracene ((+)-(1'*R*,1''*S*,11*R*)-**19a**).

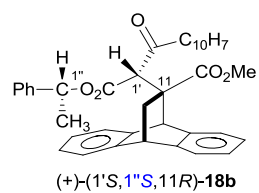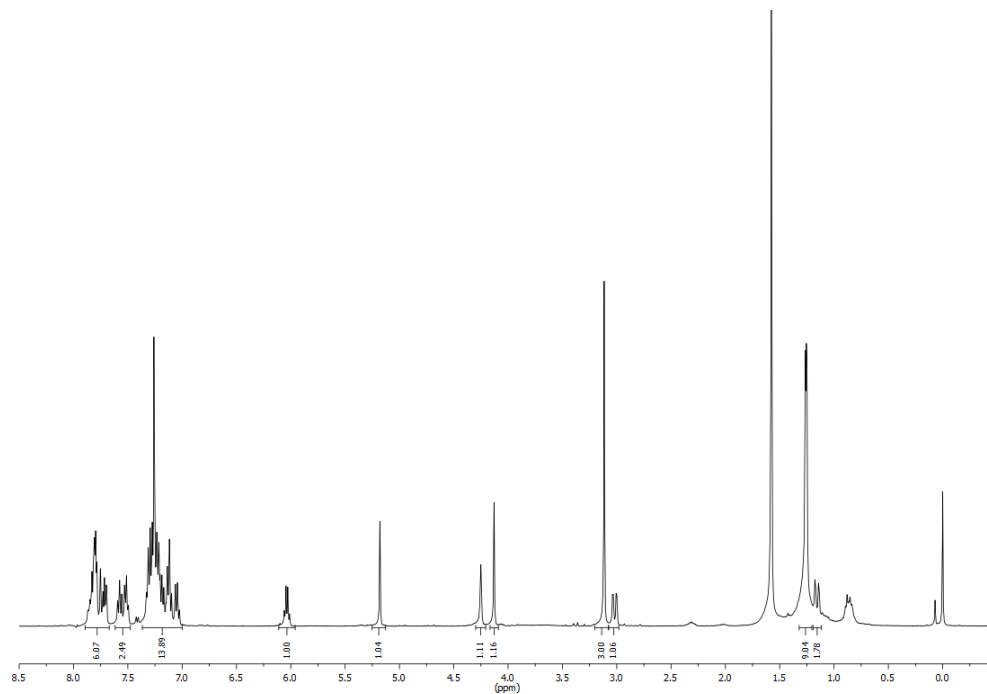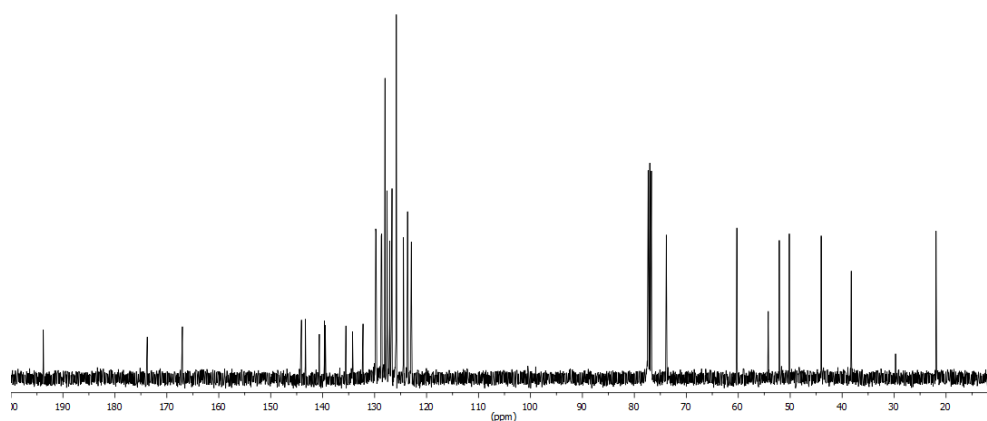

**Fig. 30S** 11-(Carbomethoxy)-(1'-naphthoyl-1'-carbo(1''-phenylethoxy)methyl)-9,10-dihydro-9,10-ethanoanthracene ((+)-(1'S,1''S,11R)-**18b**).

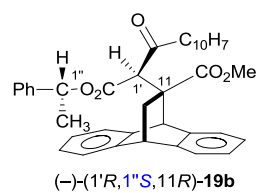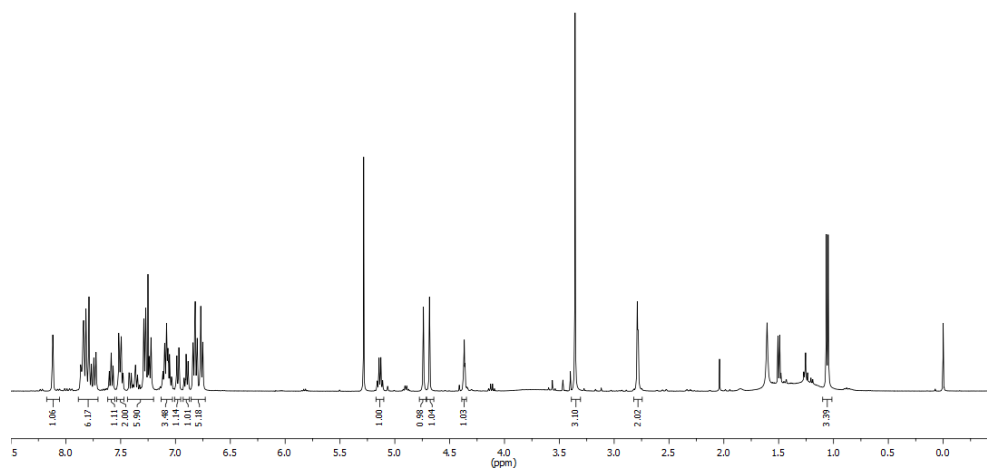

**Fig. 31S** 11-(Carbomethoxy)-(1'-naphthoyl-1'-carbo-(1''-phenylethoxy)methyl)-9,10-dihydro-9,10-ethanoanthracene ((-)-(1'*R*,1''*S*,11*R*)-**19b**).



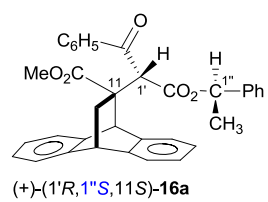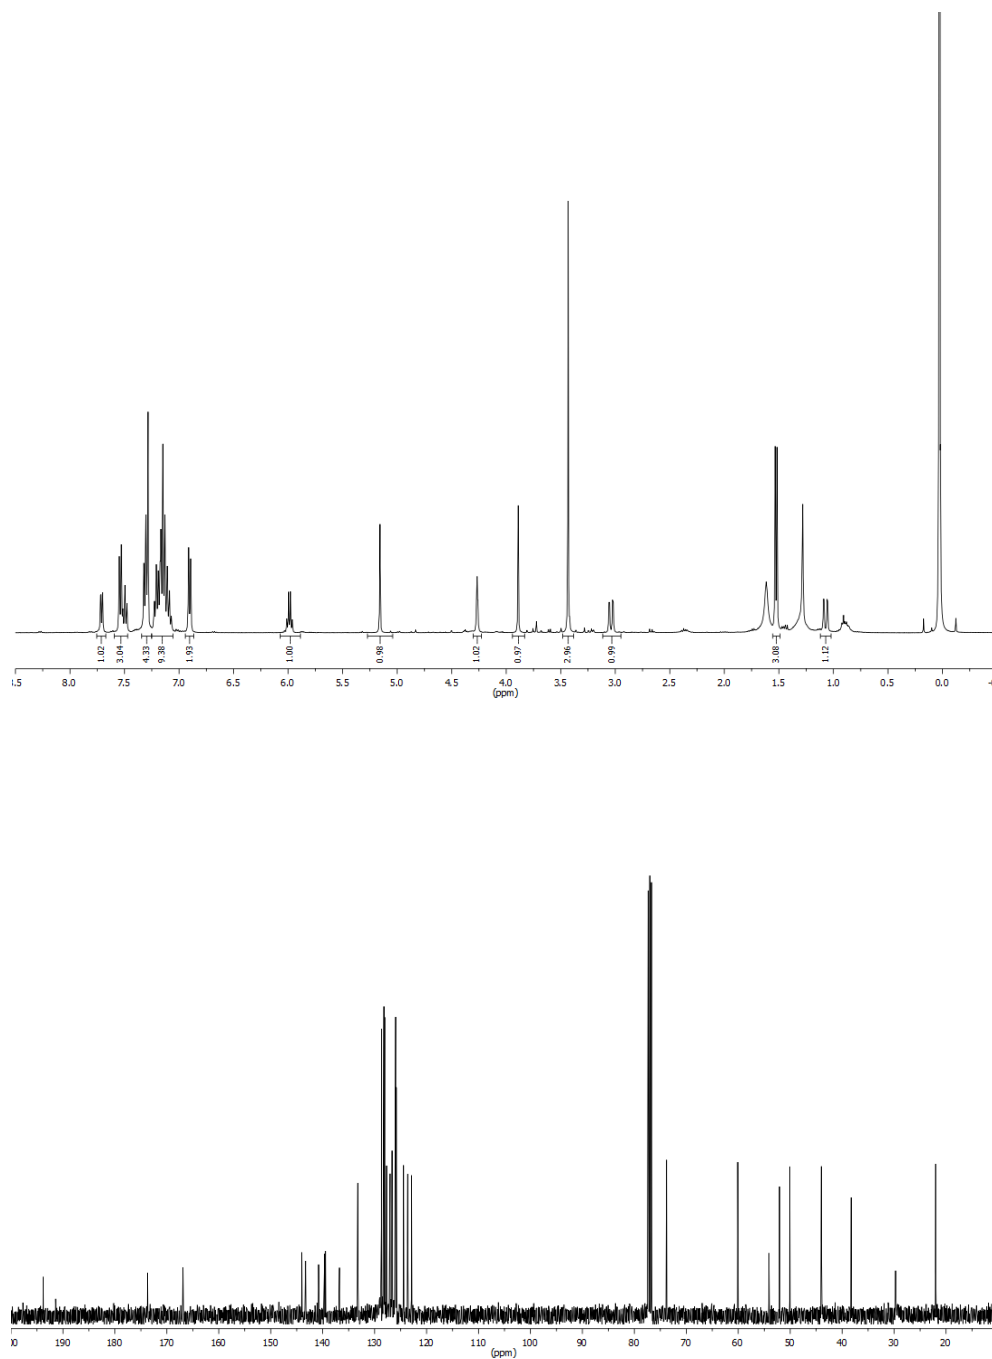

**Fig. 32S** 11-(Carbomethoxy)-(1'-benzoyl-1'-carbo-(1''-phenylethoxy)methyl)-9,10-dihydro-9,10-ethanoanthracene ((+)-(1'*R*,1''*S*,11*S*)-**16a**).

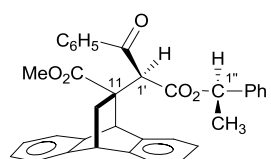

(-)-(1'S,1''S,11S)-17a

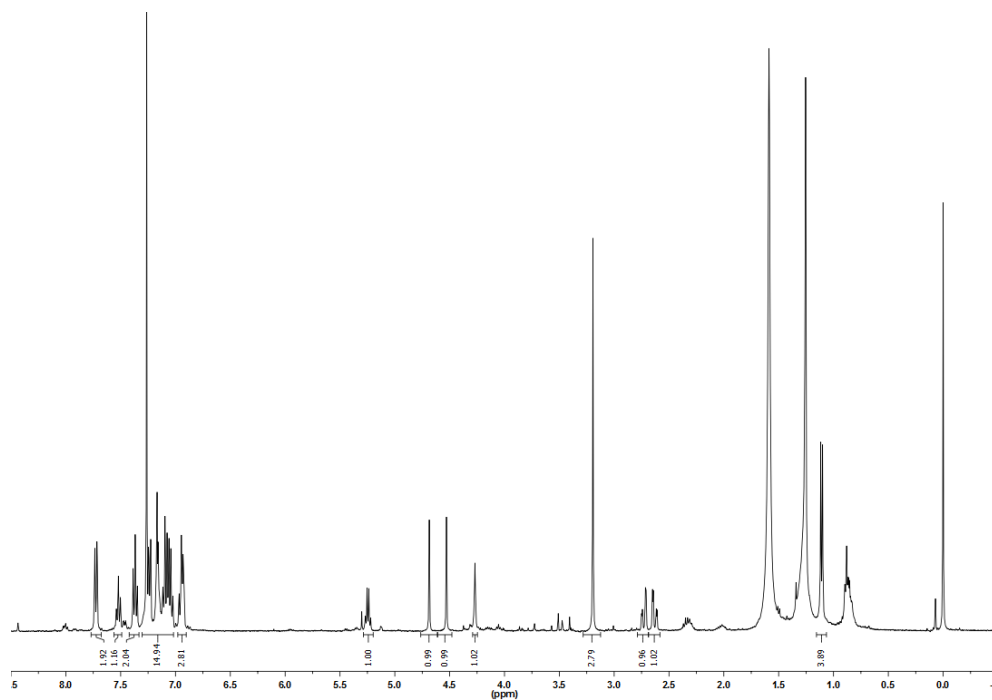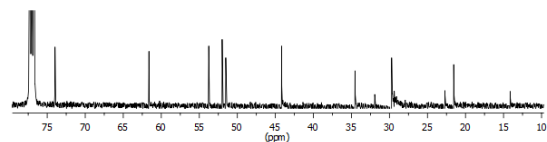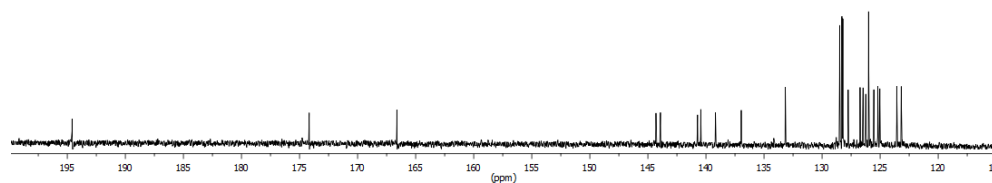

**Fig. 33S** 11-(Carbomethoxy)-(1'-benzoyl-1'-carbo-(1''-phenylethoxy)methyl)-9,10-dihydro-9,10-ethanoanthracene ((-)-(1'S,1''S,11S)-17a).

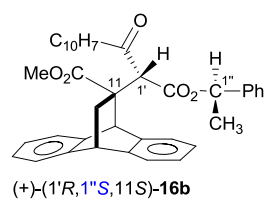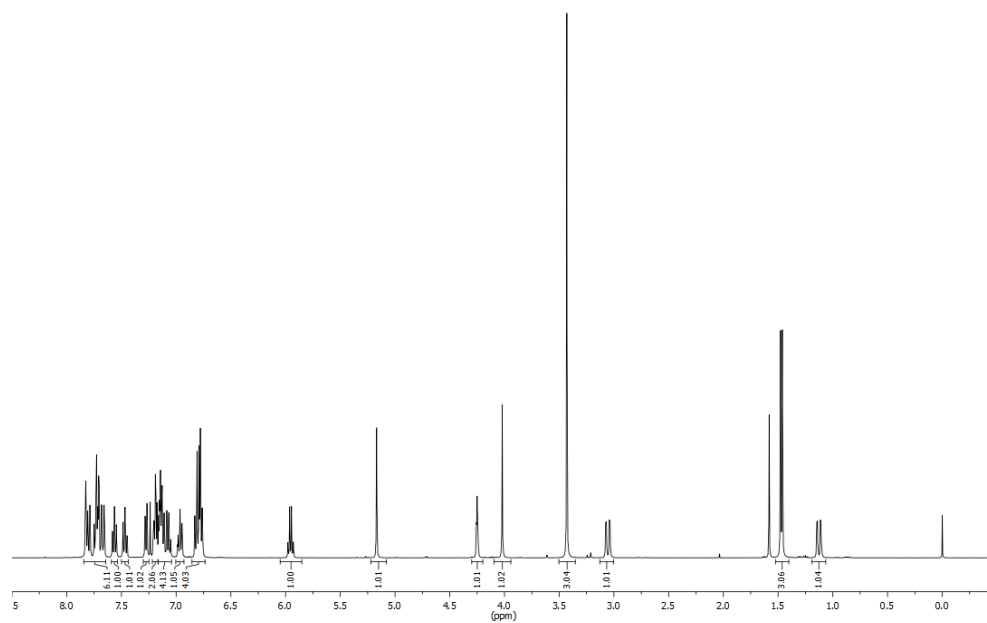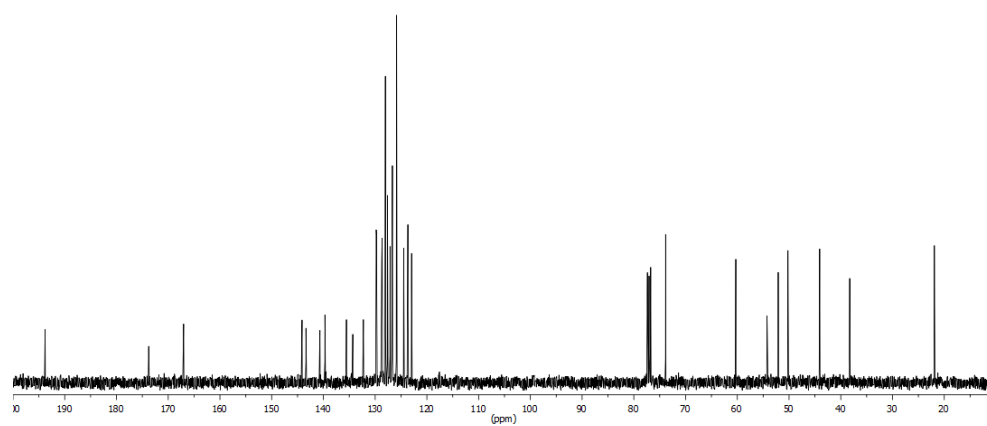

**Fig. 34S** 11-(Carbomethoxy)-(1'-naphthoyl-1'-carbo-(1''-phenylethoxy)methyl)-9,10-dihydro-9,10-ethanoanthracene ((+)-(1'R,1''S,11S)-**16b**).

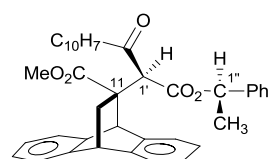

(-)-(1'S,1''S,11S)-17b

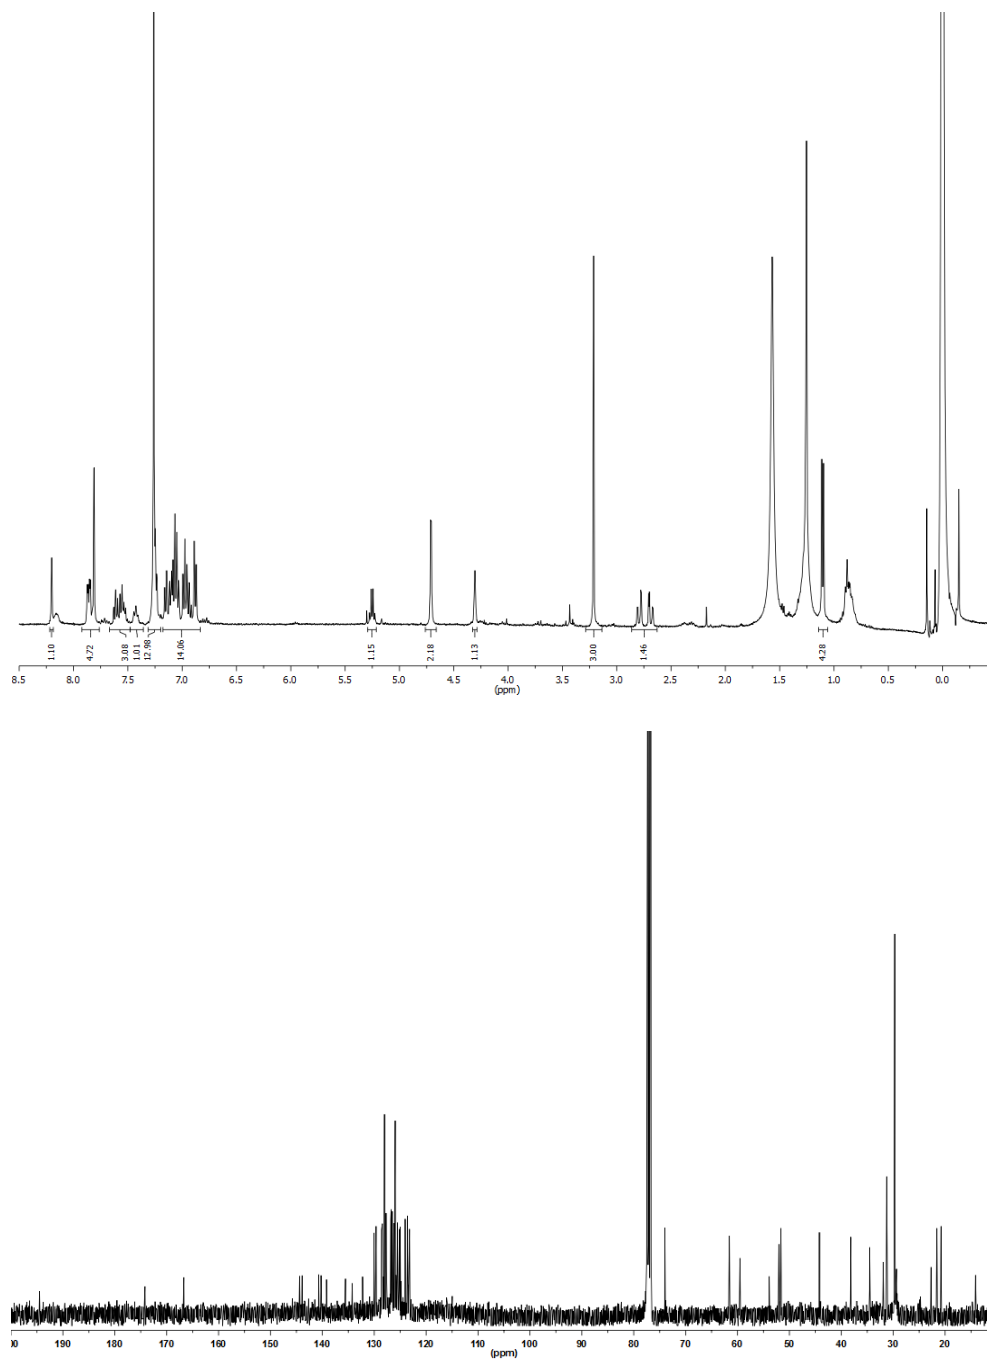

**Fig. 35S** 11-(Carbomethoxy)-(1'-naphthoyl-1'-carbo-(1''-phenylethoxy)methyl)-9,10-dihydro-9,10-ethanoanthracene ((-)-(1'S,1''S,11S)-17b).

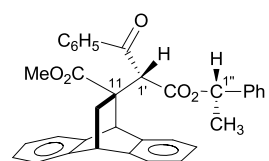

(+)-(1'*R*,1''*R*,11*S*)-**18a**

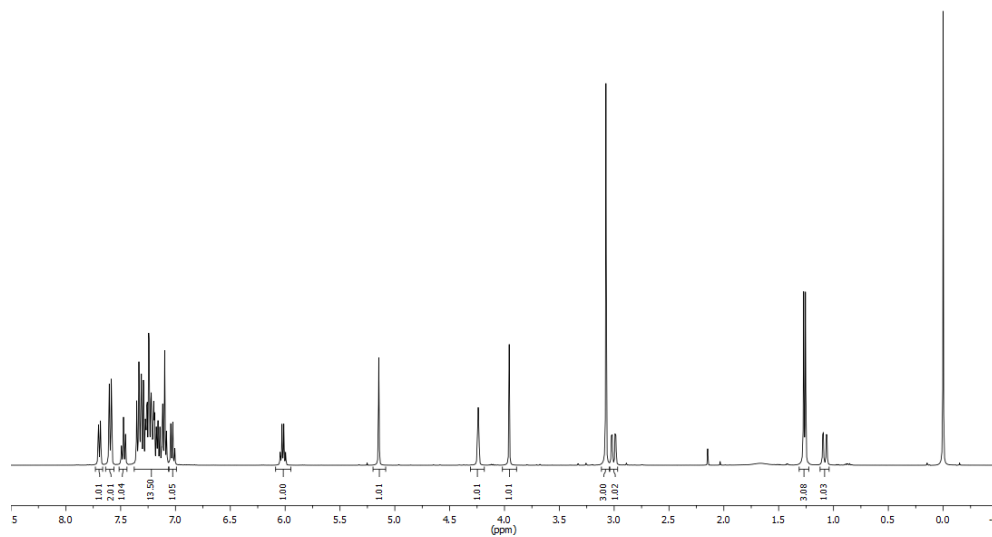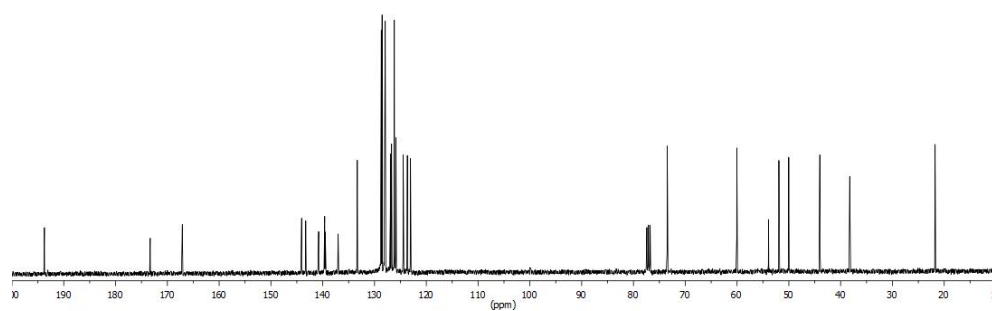

**Fig. 36S** 11-(Carbomethoxy)-(1'-benzoyl-1'-carbo-(1''-phenylethoxy)methyl)-9,10-dihydro-9,10-ethanoanthracene ((+)-(1'*R*,1''*R*,11*S*)-**18a**).

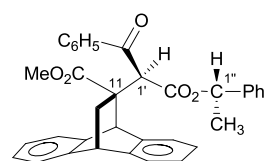

(-)-(1'S,1''R,11S)-**19a**

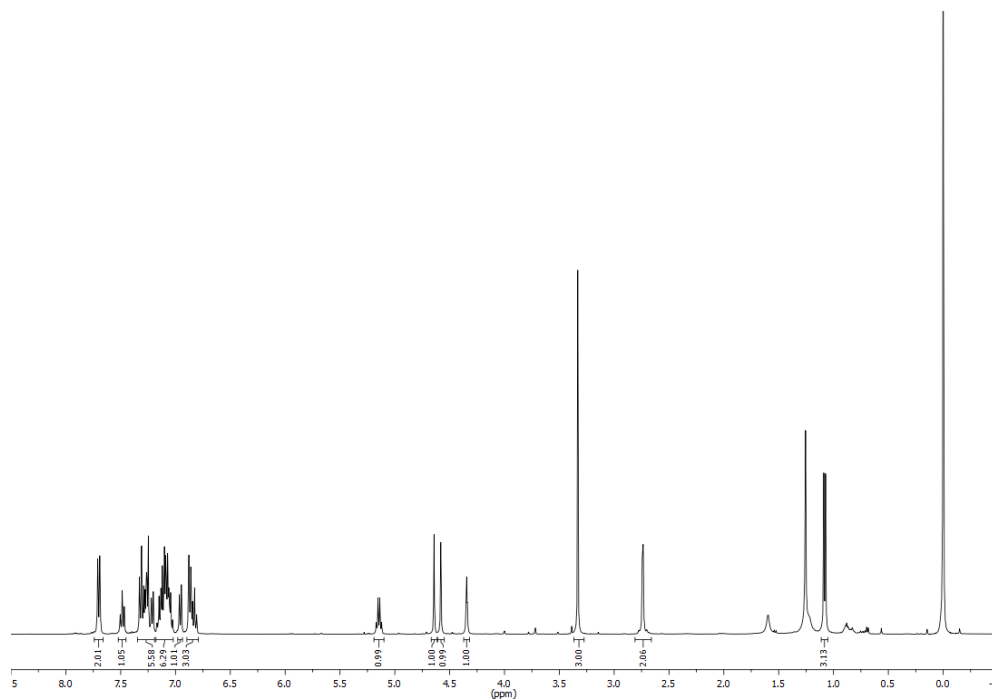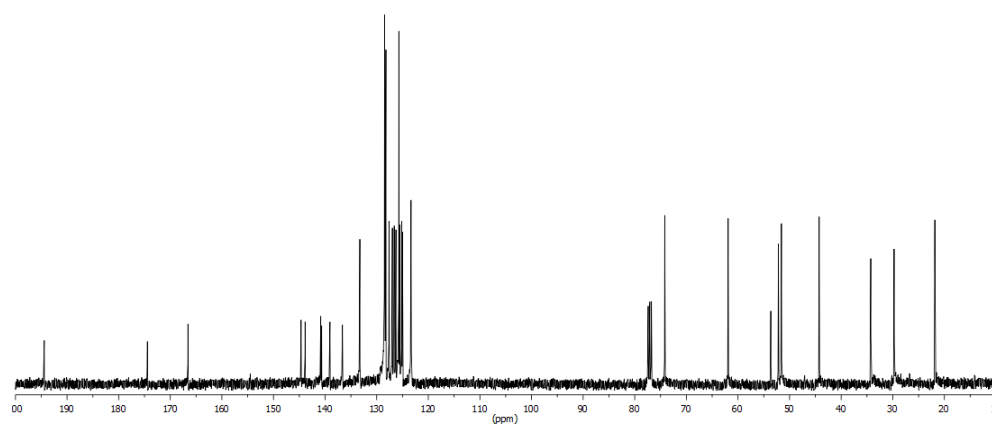

**Fig. 37S** 11-(Carbomethoxy)-(1'-benzoyl-1'-carbo-(1''-phenylethoxy)methyl)-9,10-dihydro-9,10-ethanoanthracene ((-)-(1'S,1''R,11S)-**19a**).

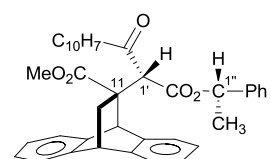

(-)-(1'R,1''R,11S)-**18b**

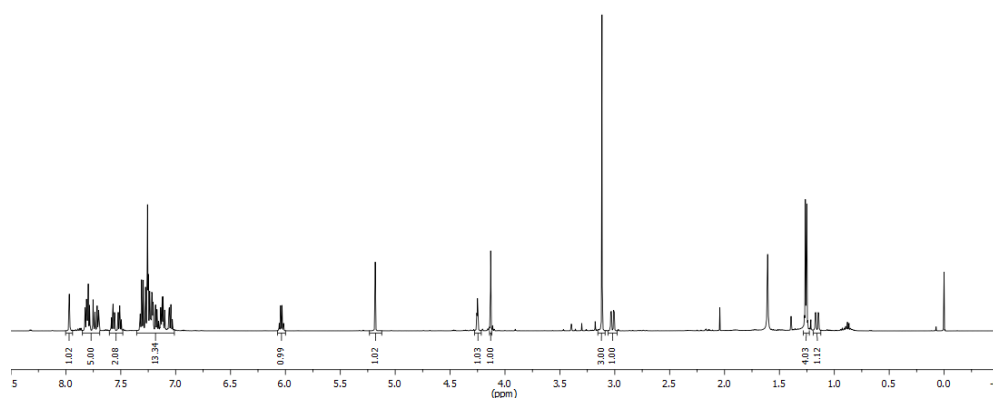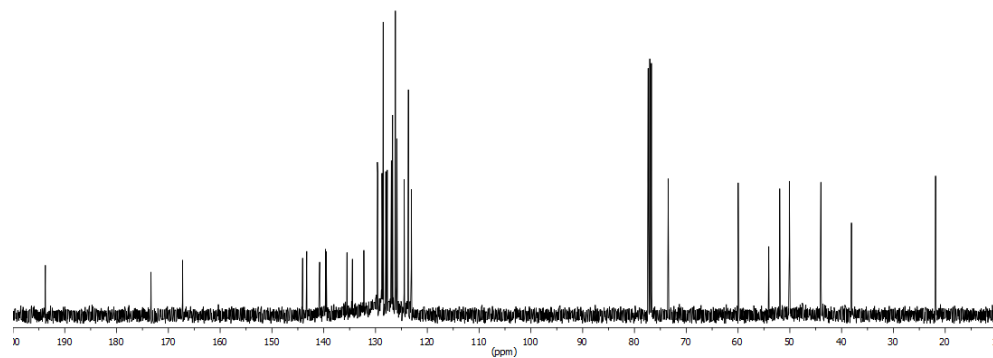

**Fig. 38S** 11-(Carbomethoxy)-(1'-naphthoyl-1'-carbo-(1''-phenylethoxy)methyl)-9,10-dihydro-9,10-ethanoanthracene ((-)-(1'R,1''R,11S)-**18b**).

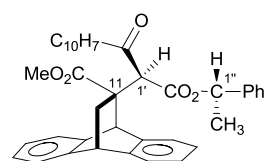

(+)-(1'S,1''R,11S)-**19b**

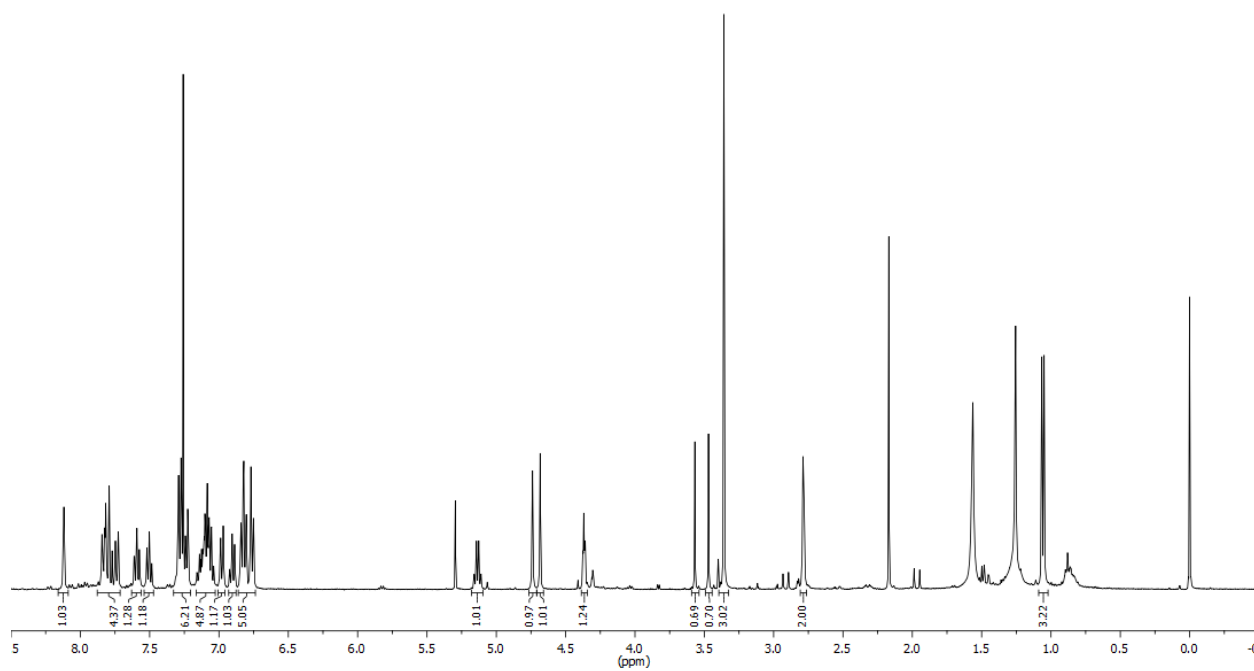

**Fig. 39S** 11-(Carbomethoxy)-(1'-naphthoyl-1'-carbo-(1''-phenylethoxy)methyl)-9,10-dihydro-9,10-ethanoanthracene ((+)-(1'S,1''R,11S)-**19b**).



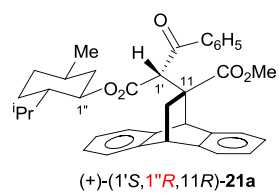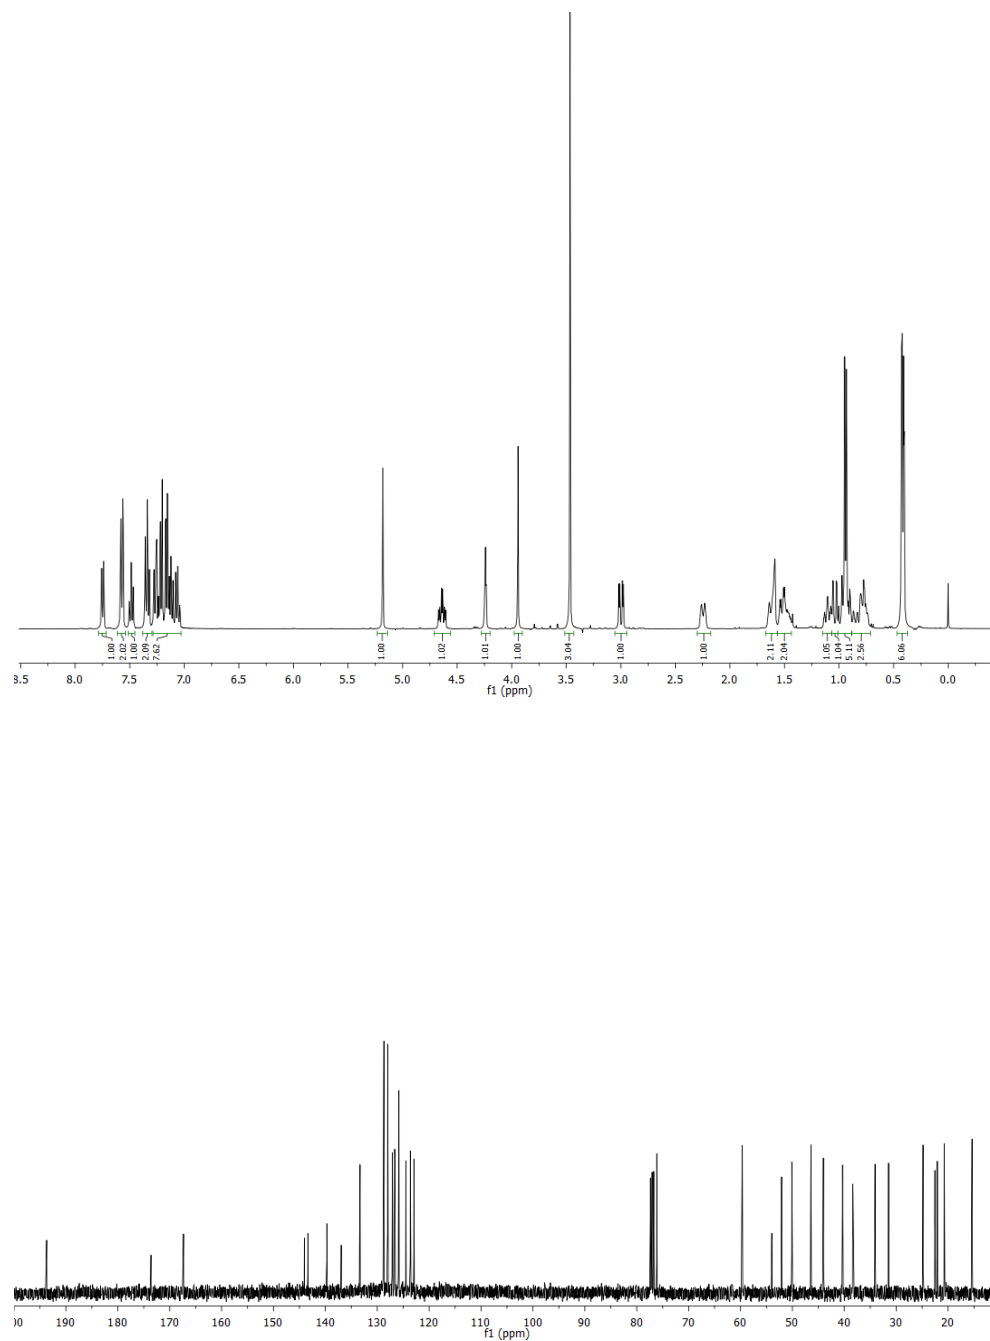

**Fig. 40S** 11-(Carbomethoxy)-11-(1'-benzoyl-1'-carbo-(1''-alkoxy)methyl)-9,10-dihydro-9,10-ethanoanthracene ((+)-(1'S,1''R,11R)-**21a**).

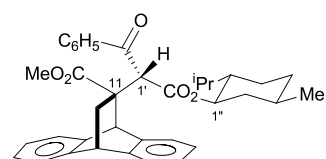

(+)-(1'R,1''R,11S)-**23a**

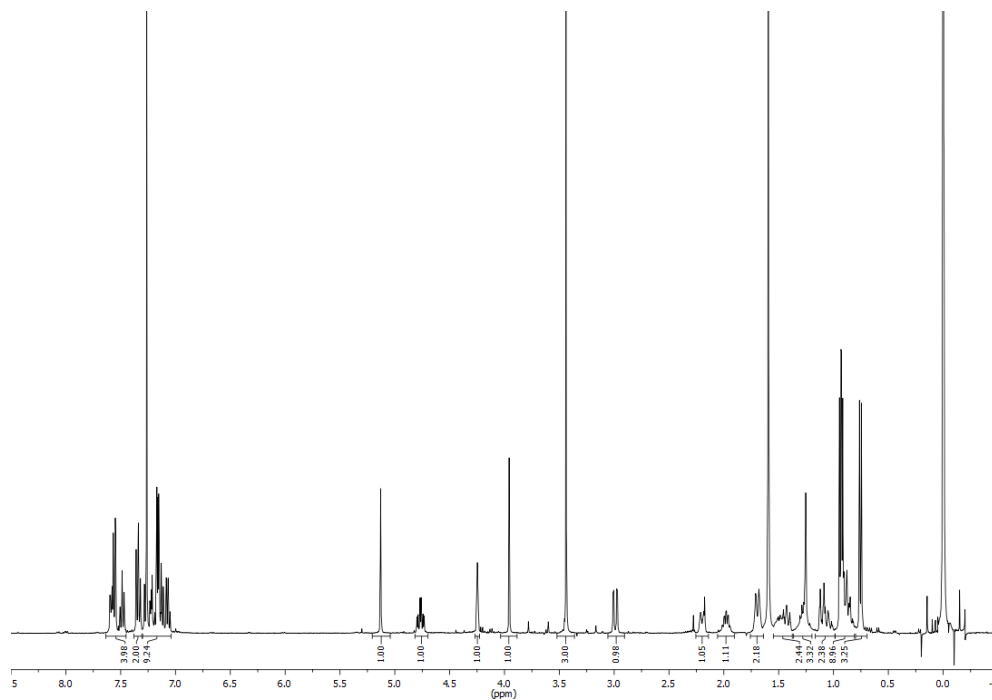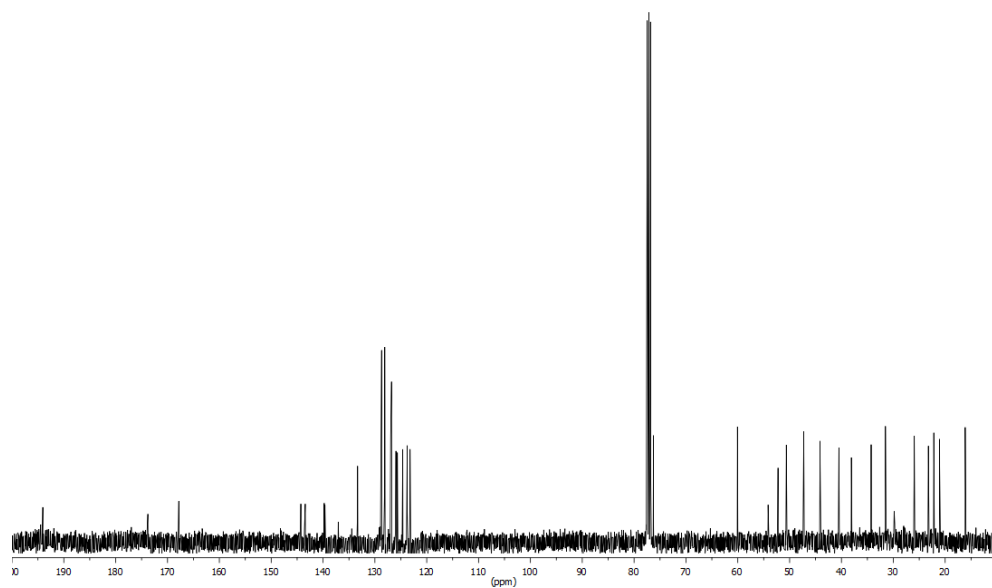

**Fig. 41S** 11-Carbomethoxy-11-(1'-benzoyl-1'-carbo-(1''-menthoxy)methyl)-9,10-dihydro-9,10-ethanoanthracene ((+)-(1'R,1''R,11S)-**23a**).

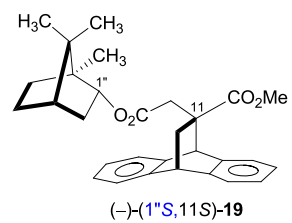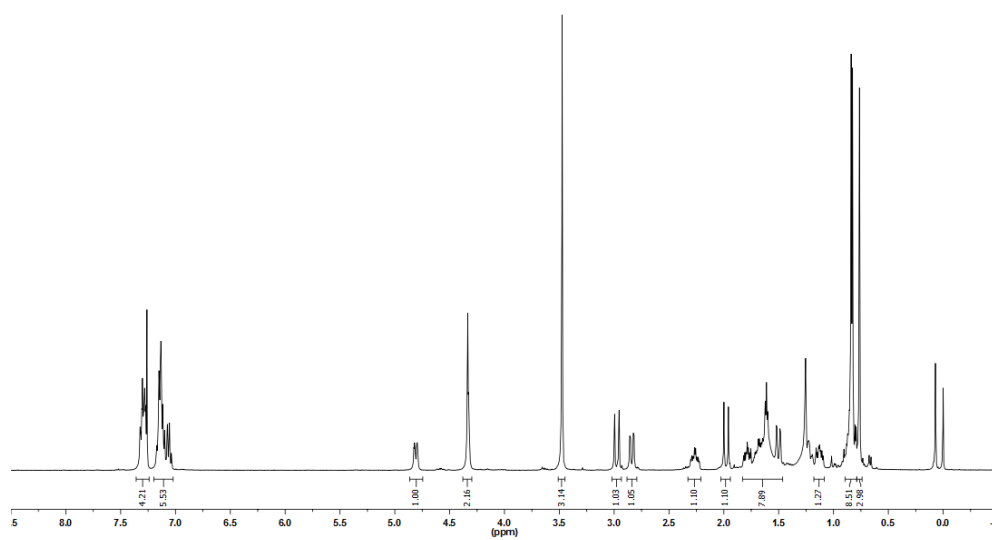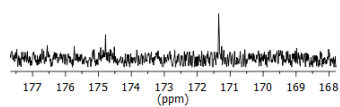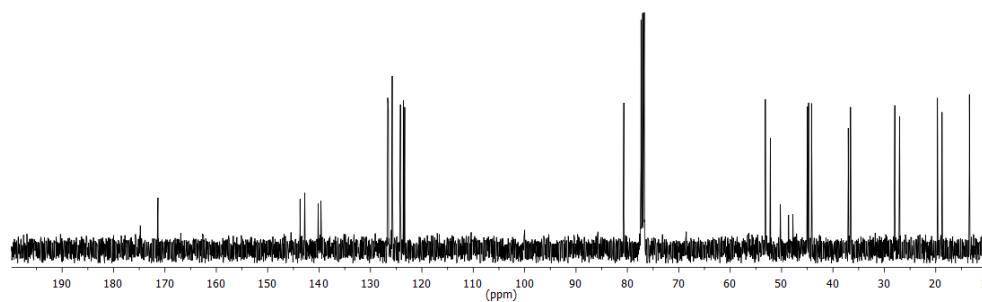

**Fig. 42S** 11-Carbomethoxy-11-[(*-*)-borneoxyacetyl]-9,10-dihydro-9,10-ethanoanthracenes ((*-*)-(1'S,11S)-**19**).

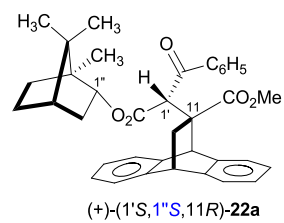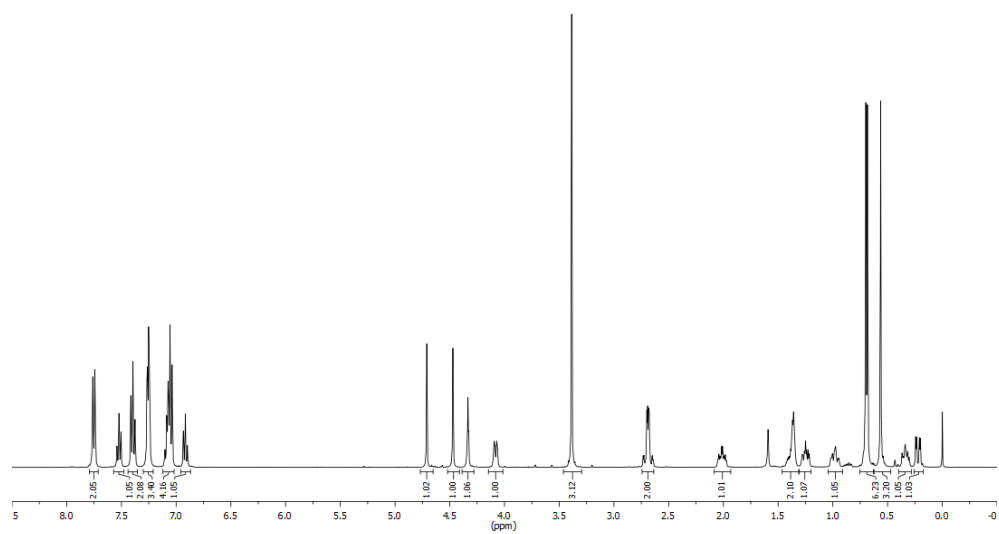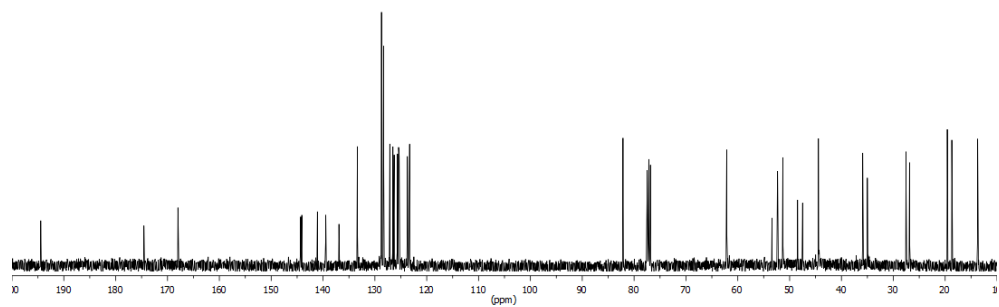

**Fig. 43S** 11-Carbomethoxy-11-(1'-benzoyl-1'-carbo-(1''-borneoxy)methyl)-9,10-dihydro-9,10-ethanoanthracene ((+)-(1'S,1''S,11R)-22a).

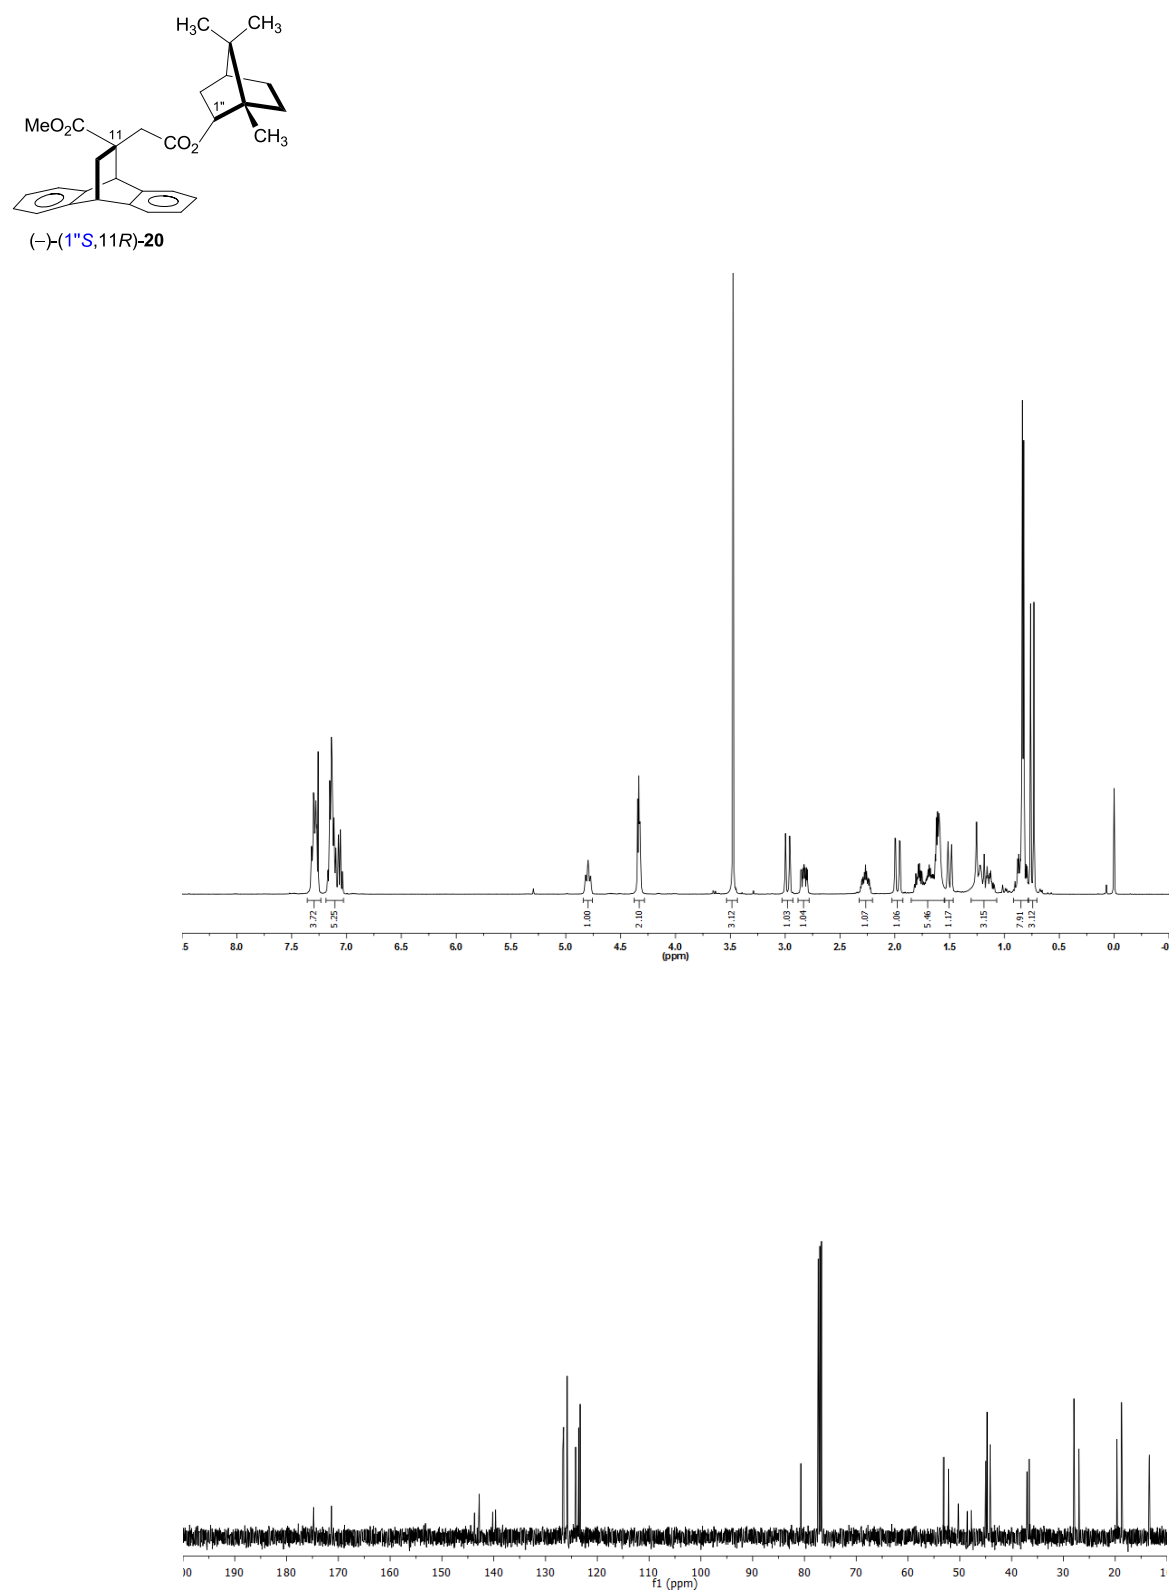

**Fig. 44S** 11-carbomethoxy-11-[(-)-borneoxyacetyl]-9,10-dihydro-9,10-ethanoanthracene ((-)-(1'',11R)-20).

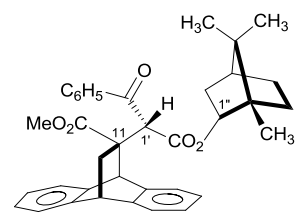

(-)-(1'*R*,1''*S*,11*S*)-**24a**

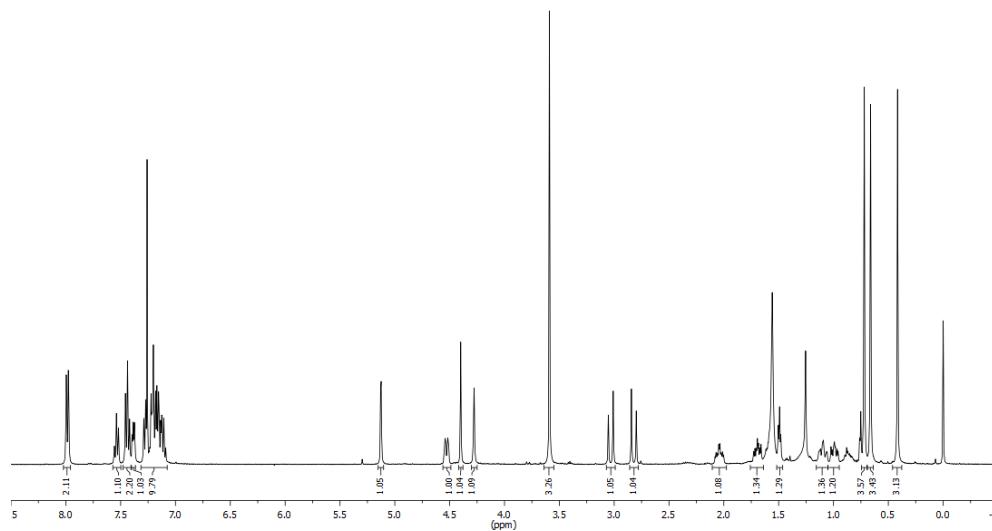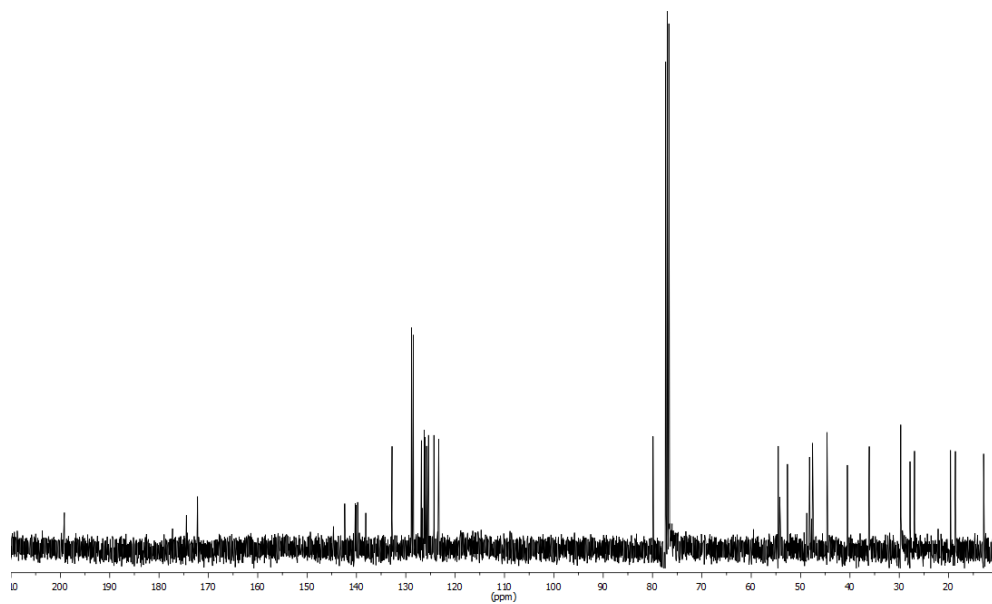

**Fig. 45S** 11-Carbomethoxy-11-(1'-benzoyl-1'-carbo-(1''-borneoxymethyl)-9,10-dihydro-9,10-ethanoanthracene ((-)-(1'*R*,1''*S*,11*S*)-**24a**).
